1 **Arabidopsis ERF4 and MYB52 Transcription Factors Play Antagonistic**  
2 **Roles in Regulating Homogalacturonan De-methylesterification in Seed**  
3 **Coat Mucilage**

4 **Anming Ding<sup>1,#</sup>, Xianfeng Tang<sup>3,#</sup>, Linhe Han<sup>1</sup>, Jianlu Sun<sup>1</sup>, Angyan Ren<sup>1</sup>, Jinhao**  
5 **Sun<sup>1</sup>, Zongchang Xu<sup>4</sup>, Ruibo Hu<sup>3</sup>, Gongke Zhou<sup>3</sup>, Yingzhen Kong<sup>2,\*</sup>**

6 <sup>1</sup>Key Laboratory of Tobacco Gene Resources, Tobacco Research Institute, Chinese  
7 Academy of Agricultural Sciences (CAAS), Qingdao 266101, P.R. China

8 <sup>2</sup>College of Agronomy, Qingdao Agricultural University, Qingdao 266109, P.R. China

9 <sup>3</sup>Key Laboratory of Biofuels, Shandong Provincial Key Laboratory of Energy genetics,  
10 Qingdao Engineering Research Center of Biomass Resources and Environment, Qingdao  
11 Institute of Bioenergy and Bioprocess Technology, Chinese Academy of Sciences (CAS),  
12 Qingdao 266101, P.R. China

13 <sup>4</sup>Matrine Agriculture Research Center, Tobacco Research Institute, Chinese Academy of  
14 Agricultural Sciences (CAAS), Qingdao 266101, P.R. China

15 #: These authors contributed equally to this work.

16 \*Corresponding author: kongzyh@qau.edu.cn

17 **Short title:** A Transcriptional Complex in Pectin Maturation

18 **One-sentence summary:** Arabidopsis ERF4 and MYB52 transcription factors interact  
19 and play antagonistic roles in regulating homogalacturonan de-methylesterification  
20 related genes in the seed coat mucilage.

21 The author responsible for distribution of materials integral to the findings presented in  
22 this article in accordance with the policy described in the Instructions for Authors  
23 (www.plantcell.org) is Yingzhen Kong, kongzyh@qau.edu.cn.

## 24 **ABSTRACT**

25 The Arabidopsis (*Arabidopsis thaliana*) seed coat mucilage is a specialized cell wall with  
26 pectin as its major component. Pectin is synthesized in the Golgi apparatus with  
27 homogalacturonan fully methylesterified, but it must undergo de-methylesterification by  
28 pectin methylesterase (PME) after being secreted into the cell wall. This reaction is  
29 critical for pectin maturation, but the mechanisms of its transcriptional regulation remain  
30 largely unknown. Here, we show that the Arabidopsis ERF4 transcription factor  
31 positively regulates pectin de-methylesterification during seed development and directly  
32 suppresses the expression of *PME INHIBITOR13* (*PMEI13*), *14*, *15* and  
33 *SUBTILISIN-LIKE SERINE PROTEASE 1.7* (*SBT1.7*). The *erf4* mutant seeds showed  
34 repartitioning of mucilage between soluble and adherent layers as a result of decreased  
35 PME activity and increased degree of pectin methylesterification. ERF4 physically  
36 associates with and antagonizes MYB52 in activating *PMEI6*, *14* and *SBT1.7* and  
37 MYB52 also antagonizes ERF4 activity in the regulation of downstream targets. Gene  
38 expression studies revealed that ERF4 and MYB52 have opposite effects on pectin  
39 de-methylesterification. Genetic analysis indicated that the *erf4-2 myb52* double mutant  
40 seeds show mucilage phenotype similar to wild-type. Taken together, this study  
41 demonstrates that ERF4 and MYB52 antagonize each other's activity to maintain the  
42 appropriate degree of pectin methylesterification, expanding our understanding of how  
43 pectin de-methylesterification is fine-tuned by the ERF4-MYB52 transcriptional complex  
44 in the seed mucilage.

## 45 **INTRODUCTION**

46 During seed development, some myxospermous species such as Arabidopsis  
47 (*Arabidopsis thaliana*) accumulate a large quantity of complex pectinaceous  
48 polysaccharides (mucilage) in the apoplast of seed coat epidermal cells or mucilage  
49 secretory cells (MSCs). In the Arabidopsis mature seeds, mucilage is compacted between

50 the primary cell wall and the volcano-shaped secondary cell wall called columella  
51 (Francoz et al., 2015; Western et al., 2000). When mature dry seeds are imbibed, the  
52 rehydrated mucilage ruptures the racial primary cell wall and expands rapidly to form a  
53 gelatinous halo that encapsulates the seed. The functional role of the mucilage  
54 polysaccharides remains unclear, but this layer has adhesive properties and possibly  
55 serves as a water-reservoir, which might facilitate seed dispersion and germination  
56 (Francoz et al., 2015; Western et al., 2000).

57 Mucilage is composed mostly of pectins (Macquet et al., 2007). The Arabidopsis seed  
58 coat mucilage provides an excellent model system for studying the biosynthesis, secretion,  
59 modification and, critically, the transcriptional regulation of pectins (Arsovski and  
60 Behavior, 2010; Francoz et al., 2015; Haughn and Western, 2012). One of the advantages  
61 of this model is that pectins can be easily detected using the histochemical stain  
62 ruthenium red (RR). The Arabidopsis seed mucilage has been shown to be composed of  
63 two layers, termed the water-soluble outer layer and the adherent inner layer (Western et  
64 al., 2001). Structural analysis reveals that both layers are composed primarily of pectic  
65 polysaccharide rhamnogalacturonan I (RG-I), whereas homogalacturonan (HG) and  
66 RG-II are minor components (Golz et al., 2018; Macquet et al., 2007). In the inner layer,  
67 cellulose and hemicellulose can also be found, contributing to the tight attachment of the  
68 adherent layer to the seed coat, whereas the soluble outer layer is easily lost (Griffiths et  
69 al., 2016; Sullivan et al., 2011; Willats et al., 2001a).

70 Pectins are synthesized in the Golgi apparatus and secreted to the apoplast with as much  
71 as 80% of the HG galacturonic acid (GalA) residues being methylesterified, and its  
72 de-methylesterification is processed by two kinds of cell wall proteins, termed pectin  
73 methylesterase (PME) and pectin methylesterase inhibitor (PMEI) (Pelloux et al., 2007;  
74 Wolf et al., 2009). The free carboxylic acid groups resulting from HG  
75 de-methylesterification by PMEs can form “egg-box” structures in cross-linking with  
76  $\text{Ca}^{2+}$ , thereby influencing the interactions between HG molecules, and thus affecting cell

---

77 wall rigidity. In turn, PMEI can impede this process by physically interacting with PME  
78 at a 1:1 ratio (Levesque-Tremblay et al., 2015a; Senechal et al., 2015; Wolf et al., 2009).  
79 Identification and characterization of Arabidopsis mutants with impaired mucilage  
80 extrusion and repartition phenotypes have demonstrated complex mechanisms of pectin  
81 structure modifications. For example, establishing the correct degree of  
82 methylesterification (DM) is supposedly essential for mucilage extrusion and repartition  
83 upon hydration. Function defects of genes such as *PMEI6*, *PMEI14*, *PME58*, *SBT1.7* and  
84 *FLY1* are assured to affect the DM, and thereby influencing mucilage structure and  
85 organization (Rautengarten et al., 2008; Saez-Aguayo et al., 2013; Turbant et al., 2016;  
86 Voiniciuc et al., 2013). In the *pmei6* seeds, methylesterified HG is absent due to high  
87 PME activity, leading to mucilage release obstruction (Saez-Aguayo et al., 2013). A  
88 similar but less severe phenotype was detected for *pmei14* seeds (Shi et al., 2018). On the  
89 contrary, *PME58* promotes HG de-methylesterification and, in the *pme58* seeds, an  
90 increase in the DM is attributed to a decrease in PME activity (Turbant et al., 2016).  
91 However, no evidence was found for interactions between PME58 and PMEI6 or  
92 PMEI14, indicating that more PMEs and PMEIs could participate in mucilage maturation,  
93 because both PME and PMEI constitute large multigene families (Turbant et al., 2016;  
94 Wang et al., 2013). The mucilage extrusion phenotype was also detected in the *sbt1.7* and  
95 *fly1* seeds (Rautengarten et al., 2008; Voiniciuc et al., 2013). However, PMEI6 and  
96 SBT1.7 may target different PMEs, given that the *pmei6 sbt1.7* double mutant presents  
97 additive phenotypes (Saez-Aguayo et al., 2013). The E3 ubiquitin ligase FLY1 is  
98 supposed to regulate pectin de-methylesterification by recycling PMEs in the MSC  
99 endomembrane system (Voiniciuc et al., 2013).

100 Although enzymes involved in the regulation of pectin de-methylesterification (either  
101 positively or negatively) have been reported, the mechanisms of their transcriptional  
102 regulation are largely unknown. At present, only three transcriptional regulators,  
103 LUH/MUM1, STK and MYB52 of pectin methylesterification modification were

---

104 identified in the seed coat mucilage. LUH/MUM1 promotes the expression of *PMEI6* and  
105 *SBT1.7* (Huang et al., 2011; Walker et al., 2011). However, LUH/MUM1 also seems to be  
106 a positive regulator of pectin de-methylesterification as PME activity is reduced in  
107 *luh/mum1* seeds (Saez-Aguayo et al., 2013). STK was found negatively regulating pectin  
108 de-methylesterification through direct activation of *PMEI6*. Therefore, the *stk* seeds  
109 present similar phenotypes to *pmei6*. STK also represses the expression of *SBT1.7*  
110 (Ezquer et al., 2016). What's more, LUH/MUM1 and STK can antagonize each other's  
111 function since each represses the other's activity. Our recent work reported that MYB52  
112 transcription factor negatively regulates pectin de-methylesterification in the seed  
113 mucilage by directly activating *PMEI6*, *PMEI14* and *SBT1.7*. Thus in the *myb52* seeds,  
114 an increase in PME activity and a decrease in DM were observed, leading to a condensed  
115 "thin" inner layer (Shi et al., 2018). These results suggest that mucilage  
116 methylesterification modifications underlie the regulation of a complex regulatory  
117 network.

118 The Arabidopsis AP2/ERF superfamily was divided into AP2, ERF, RAV families and a  
119 soloist gene (Nakano et al., 2006). To date, the only identified member of the AP2 family  
120 is *AP2*, which likely plays an indirect role in mucilage production, considering that the  
121 MSCs cannot be differentiated in the *ap2* seeds (Jofuku et al., 1994; Western et al., 2001).  
122 *ETHYLENE RESPONSIVE FACTOR4* (*ERF4*) belongs to the ERF family, Group VIII  
123 (B-1a), and all eight genes, *ERF3*, *ERF4* and *ERF7~12* from this subgroup were proved  
124 to be transcriptional repressors (Fujimoto et al., 2000; Koyama et al., 2013; Maruyama et  
125 al., 2013; Yang et al., 2005). *ERF4* has been shown to have diverse functions in plant  
126 growth and development, such as modulating ethylene, abscisic acid (ABA), jasmonic  
127 acid (JA) and gibberellic acid (GA) responses (McGrath et al., 2005; Yang et al., 2005;  
128 Zhou et al., 2016), operating in the progression of leaf senescence (Koyama et al., 2013;  
129 Riester et al., 2019), enhancing resistance to pathogens (McGrath et al., 2005), promoting  
130 internode elongation (Zhou et al., 2016), and also playing important roles in nutrition

131 stress (Liu et al., 2017). *ERF4* is expressed ubiquitously in Arabidopsis (Winter et al.,  
132 2007), suggesting that it has other functions in addition to those mentioned above. For  
133 example, its regulatory role in cell wall biology has not been reported yet.

134 Here, we provide evidence that *ERF4* positively regulates pectin de-methylesterification  
135 in the seed mucilage. We find a repartitioning of seed mucilage polysaccharides in the  
136 *erf4* seeds under vigorous shaking conditions which can be attributed to an increase in  
137 DM. ERF4 binds to the *cis*-regulatory elements and directly suppresses the expression of  
138 *PMEI13*, *14*, *15* and *SBT1.7*. Moreover, ERF4 and MYB52 were found to interact, and  
139 play completely opposite roles in pectin de-methylesterification by antagonizing each  
140 other's transcriptional activity, which is confirmed by gene expression and genetic  
141 evidence. Overall, these findings provide a fine-tuned mechanism where ERF4 and  
142 MYB52 antagonistically control mucilage modification related genes.

## 143 **RESULTS**

### 144 **Expression pattern of *ERF4* is correlated with seed mucilage deposition**

145 Previous studies revealed that *ERF4* is expressed in various tissues with its transcripts  
146 accumulating predominantly in developing seeds (Winter et al., 2007) (Supplemental  
147 Figure 1A). Our re-analysis of the microarray datasets for Laser Capture Microdissected  
148 seed samples (GSE12404) identified a significant up-regulation of *ERF4* during seed coat  
149 development stages (Hu et al., 2016). To confirm these findings, we investigated the  
150 expression pattern of *ERF4* by qRT-PCR in developing seeds at 4, 7, 9, 11 and 13  
151 days-post-anthesis, (DPA) as well as in major Arabidopsis organs. We observed that  
152 *ERF4* transcripts were detected in all examined tissues. In particular, *ERF4* showed a  
153 strong expression in developing siliques with the highest level found in 13 DPA seeds,  
154 which is equivalent to the mature green embryo stage (Figure 1A). This expression  
155 pattern coincides with the period for mucilage polysaccharides production in the seed  
156 coat (Francoz et al., 2015).

---

157 To obtain more detailed information on its spatial and developmental expression profile,  
158 a *proERF4::GUS* construct was generated and transformed in wild-type plants. *GUS*  
159 expression was detected in vascular tissues, guard cells and main roots of 5-day old  
160 seedlings (Supplemental Figure 2A to C). In mature plants, *GUS* activity was detected in  
161 root tips, inflorescence internodes, mature rosette and cauline leaves (Supplemental  
162 Figure 2D to G). In blooming flowers, *GUS* staining was observed in petals, stigma and  
163 pollen (Supplemental Figure 2H). The *GUS* signal was also notably detected in 4 DPA  
164 siliques and MSCs of developing seeds (Supplemental Figure 2I to K). Taken together,  
165 these results confirm the expression of *ERF4* in testas of developing seeds when  
166 mucilage polysaccharides are produced during 7~13 DPA of embryogenesis. In addition,  
167 using Cytoscape v3.7.1 software equipped with the GeneMANIA tool (Warde-Farley et  
168 al., 2010), *ERF4* was predicted to be co-expressed with multiple mucilage genes (Figure  
169 1B). These results suggest that *ERF4* might be involved in the regulation of mucilage  
170 deposition in the seed coat.

### 171 **Area of mucilage capsule is reduced in the *erf4* mutants**

172 Two independent T-DNA insertion lines, *erf4-1* and *erf4-2* (*erf4* hereafter, unless  
173 specified) were isolated in the background of Col-0 ecotype (Figure 1C). The transcripts  
174 of *ERF4* in *erf4* homozygous were detected by RT-PCR. Results showed that both lines  
175 are null mutants for *ERF4* (Figure 1D).

176 To determine whether *ERF4* functions in seed mucilage production, mature dry seeds  
177 were examined by RR staining. Upon imbibition in distilled water with moderate shaking,  
178 no significant difference was observed (Supplemental Figure 3A and B). However, when  
179 shaken at a frequency of 200 rpm for 1 h, the *erf4* seeds showed thinner mucilage halos  
180 and the area of adherent mucilage was reduced by ~30% compared to wild-type (Figure  
181 1E and F). In addition, when *erf4-2* was transformed with functional *ERF4*, driven by the  
182 cauliflower mosaic virus (CaMV) 35S promoter (*35S::ERF4*), the reduced adherent

183 mucilage phenotype was complemented (Supplemental Figure 4A and B). These results  
184 support that the deletion of *ERF4* is responsible for the mucilage defect.

185 We also examined seed coat morphology to clarify effects of the *ERF4* mutation on seed  
186 coat development. Scanning electron microscopy of the mature seeds' surface showed  
187 that the volcano-shaped collumella and the radial wall were similar between wild-type  
188 and *erf4-2* seeds (Supplemental Figure 3C and D). Developing seeds (at 7 and 10 DPA)  
189 were sectioned and stained to determine if the seed mucilage deposition was affected.  
190 The results showed that the shape of the MSCs was similar between *erf4-2* and wild-type,  
191 and the deposition of mucilage was also unaffected (Supplemental Figure 3E). Altogether,  
192 these results revealed that the *erf4-2* seed coat morphology is unaltered compared with  
193 wild-type, but its adherent mucilage layer seems to be loose and can be extracted more  
194 easily than wild-type in water, indicating that the *ERF4* mutation might affect pectin  
195 structure and organization during mucilage maturation.

#### 196 **Mucilage partitioning is modified in *erf4* seeds**

197 We have observed that the area of *erf4* adherent layer was smaller than that of wild-type  
198 seeds. To testify whether the distribution of mucilage layers was affected, water-soluble  
199 mucilage (SM) and adherent mucilage (AM) were sequentially extracted from *erf4* and  
200 wild-type mature seeds in deionized water (Supplemental Figure 3F and G), and analyzed  
201 for their sugar content and composition (Supplemental Table 1). As the major component  
202 of Arabidopsis seed mucilage is RG I, compositional analysis showed that both SM and  
203 AM layers of wild-type and *erf4* consisted predominantly of rhamnose (Rha) and GalA at  
204 a molar ratio close to 1. A small quantity of other monosaccharides was also detected.  
205 However, in the *erf4* SM layer, the content of Rha and GalA was increased by ~20%  
206 compared to that of wild-type seeds. In contrast, in the AM layer, the content of Rha and  
207 GalA decreased by 21 and 50% (in *erf4-1* and *erf4-2*, respectively), compared to that in  
208 wild-type.



---

209 As expected, the amount of mucilage in the *erf4* AM layer was reduced to ~60% of that  
210 in wild-type, whereas in its SM layer the quantity of mucilage sugars was increased by  
211 ~20% (Figure 1G). The *erf4* seeds thus showed a re-distribution of the SM and AM layers.  
212 However, the total amount of mucilage sugars across the two fractions was nearly  
213 unaltered between *erf4* and wild-type (Figure 1G). Moreover, no appreciable differences  
214 were noted in the total content of Rha (~43, ~39 and ~40% in *erf4-1*, *erf4-2* and  
215 wild-type seed mucilage, respectively) or GalA (~48, ~51 and ~52% in *erf4-1*, *erf4-2* and  
216 wild-type seed mucilage, respectively). The above results suggest that the mutation in  
217 *ERF4* does not affect the biosynthesis of seed coat mucilage but affects the modifications  
218 of mucilage structure.

#### 219 ***ERF4* mutation affects HG methylesterification in adherent mucilage**

220 The DM is believed to have impacts on mucilage physical properties, and thus can affect  
221 mucilage extrusion and repartition. To establish whether DM is altered in the *erf4* seed  
222 mucilage, we determined DM indirectly by quantification of the formaldehyde produced  
223 from methanol by alcohol oxidase (Klavons and Bennett, 1986). In *erf4-1* and *erf4-2*, DM  
224 was increased by ~10% and ~19% compared to that in wild-type, respectively (Figure  
225 2A). Since the methanol released from seed mucilage is supposed to be derived from  
226 methylesterified HGs (Ezquer et al., 2016), our results suggest that *ERF4* might play a  
227 role in promoting HG de-methylesterification in the seed mucilage.

228 The epitopes presented in the seed coat surface can be recognized and labeled by certain  
229 antibodies through immunolabeling experiments. For example, JIM5, JIM7 and  
230 CCRC-M38 antibodies can recognize poorly methylesterified HGs, highly  
231 methylesterified HGs and non-esterified HGs, respectively (Macquet et al., 2007; Willats  
232 et al., 2001b). To further determine whether *ERF4* affects DM, whole-seed  
233 immunolabeling was performed on wild-type and *erf4* seeds. Upon rehydration of mature  
234 dry seeds soluble mucilage was easily lost, resulting in immunolabeling of mainly

---

235 adherent mucilage. In wild-type seeds, the JIM7 signal was located throughout the AM,  
236 and a significant increase in labelling signal was observed for both *erf4-1* and *erf4-2*  
237 (Figure 2B). In turn, JIM5 labelling showed a notable decrease of less methylesterified  
238 HGs along the ray structures in *erf4* compared to wild-type (Figure 2C). When  
239 immunolabeling was performed with CCRC-M38, the labelling was also significantly  
240 reduced (Figure 2D). De-methylesterification is supposed to facilitate the formation of  
241 calcium-mediated cross-links between neighboring HG molecules, which can be  
242 recognized by 2F4 antibody (Willats et al., 2001a). Our immunolabeling analysis showed  
243 that the labelling intensity was strongly reduced in *erf4-2* seeds compared to wild-type,  
244 suggesting a decreased amount of this cross-linking in mutants (Supplemental Figure 5).  
245 Collectively, the mutation in *ERF4* inhibits pectin de-methylesterification in the seed  
246 mucilage.

#### 247 **PME activity is inhibited in the *erf4* seeds**

248 To identify whether the increased DM in *erf4* seeds was a result of decreased PME  
249 activity, total proteins were extracted from whole seeds of wild-type, *erf4*,  
250 *erf4-2:35S::ERF4* and *35S::ERF4* overexpressors, and PME activity was determined as  
251 previously described by Lekawska-Andrinopoulou et al. (2013) with the average  
252 wild-type PME activity being normalized to 100% (=1). The results showed that PME  
253 activity was reduced by ~13% and ~17% in the *erf4-1* and *erf4-2* seeds, whereas it was  
254 elevated by 5~14% in *35S::ERF4* lines compared to wild-type (Figure 2E and F). As  
255 expected, PME activity in *erf4-2:35S::ERF4* was not significantly altered (Supplemental  
256 Figure 4C). Collectively, *ERF4* positively regulates mucilage de-methylesterification by  
257 promoting PME activity.

258 We also observed that, compared to wild-type, the seed size of *35S::ERF4* was increased  
259 on average by ~12% in length and ~9% in width, resulting in a significant increase of  
260 seed area (Supplemental Figure 6A to C). Furthermore, a significant increase of MSC

---

261 surface area in *35S::ERF4* seeds was also detected (Supplemental Figure 6D and E). So,  
262 even if structure of epidermal cells of the *erf4-2* seeds appears unchanged,  
263 overexpression of *ERF4* seems to promote seed coat epidermal cell and seed size.

#### 264 **ERF4 affects the expression of genes involved in DM modification**

265 PMEI can inhibit PME activity through direct protein-protein interaction, thus we  
266 speculate that as a transcription repressor ERF4 might promote PME activity by  
267 suppressing certain *PMEI* genes. To test this hypothesis, expression fold change of the  
268 *PMEI* gene family (Wang et al., 2013) was investigated by qRT-PCR using RNAs from  
269 *erf4-2*, *35S::ERF4* and wild-type developing seeds at 13 DPA. *PMEI* genes including  
270 *PMEI6*, *PMEI13*, *PMEI14*, *EDA24*, *AT1G11593*, *AT1G70720*, *AT3G05741*, *AT4G03945*  
271 and *AT4G12390* had similar expression pattern, being significantly up-regulated in *erf4-2*  
272 and down-regulated in *35S::ERF4* (Figure 2G; Supplemental Figure 7A) compared to  
273 that in wild-type seeds. The ERF transcription factors are well known for binding to  
274 *cis*-acting elements of GCC-box (GCCGCC) or DRE-motif (CCGAC). Of the 9 *PMEIs*,  
275 *PMEI13*, *PMEI14* and *AT3G05741* (termed *PMEI15* hereafter) have predicted GCC-box  
276 motifs in their promoter or intron regions (Figure 3A to C). Although *PMEI6* was  
277 included, no ERF binding site was found in its promoter, suggesting that ERF4 might  
278 negatively regulate its expression indirectly.

279 We also examined relative expression levels for genes reported to be associated with  
280 PME activity, such as *LUH/MUM1*, *STK*, *MYB52*, *FLY1*, *SBT1.7*, *PME58* and *UUAT1*.  
281 The qRT-PCR results showed that except *SBT1.7* the others had no significant change in  
282 expression (Figure 2G; Supplemental Figure 7B). *Cis*-element analysis showed that  
283 *SBT1.7* also has one GCC-box motif in its exon region (Figure 3D).

#### 284 **ERF4 binds the GCC-box motifs in *PMEI13*, *14*, *15* and *SBT1.7***

285 To test whether ERF4 could bind the GCC-box motifs in *PMEI13*, *14*, *15* and *SBT1.7*, we  
286 designed 5'-Biotin labelled probes (Supplementary Table 2) containing the GCC-box

---

287 motif in electrophoretic mobility shift assays (EMSA) to assess the binding ability of  
288 ERF4 to these fragments *in vitro*. As hypothesized, purified MBP-ERF4 fusion protein  
289 bound to the GCC-box containing fragments of both *PMEI13*, *14*, *15* and *SBT1.7* (Figure  
290 3A to D, lane 3). When MBP was added alone, no mobility shift was observed (Figure 3A  
291 to D, lane 2). Moreover, the binding of ERF4 to these labelled probes was weakened by  
292 the addition of an unlabeled competitor (Figure 3A to D, lane 4 and 5).

293 To assess whether ERF4 binds to these GCC-box motifs *in vivo*, we conducted chromatin  
294 immunoprecipitation (ChIP)-qPCR assays with chromatin extracts from developing seeds  
295 of wild-type plants and plants overexpressing Myc-tagged ERF4 (*35S::Myc-ERF4*). The  
296 presence of ERF4 substantially enhanced detection of the GCC-box containing sequences  
297 in the promoters of *PMEI13*, *15*, intron of *PMEI14* (*14i*) and exon of *SBT1.7* (*SBT1.7e*),  
298 indicating that ERF4 bound to these sequences *in planta* (Figure 3E). Finally, the  
299 transcriptional regulation of ERF4 to these targets was evaluated through the detection of  
300 relative LUC activity in wild-type Arabidopsis protoplasts with REN being used as  
301 internal control. Effector plasmid *35S::ERF4* and reporter plasmids *proPMEI13*, *14i*, *15*  
302 or *SBT1.7e::LUC* were generated. When *35S::ERF4* was co-transformed with either  
303 reporter plasmid, the LUC activity was significantly inhibited (Figure 3F). To test the  
304 authenticity of ERF4 suppressing *SBT1.7* expression by binding to the GCC-box motif in  
305 its exon region, co-transformation of *35S::ERF4* and *promuSBT1.7e* with a mutational  
306 GCC-box abolished this binding (Supplemental Figure 8). Together, our data indicate that  
307 ERF4 could negatively regulate the expression of *PMEI13*, *14*, *15* and *SBT1.7* by directly  
308 binding to the regulatory elements that locate in the promoter, intron or exon region.

### 309 **Functions of *PMEI13* and *PMEI15* in seed mucilage maturation**

310 Both *PMEI13*, *14*, *15* and *SBT1.7* are predominantly expressed in developing seeds at  
311 either 4 or 7 DPA, as verified in our qRT-PCR analysis (Supplemental Figure 1B to F).  
312 The roles of *PMEI14* and *SBT1.7* in seed mucilage maturation have been well established

---

313 (Rautengarten et al., 2008; Shi et al., 2018). To determine if *PMEI13* and *PMEI15* have  
314 similar functions in seed mucilage maturation, seeds of *pmei13* and *pmei15* null mutants  
315 were stained with RR. Under vigorous shaking conditions, *pmei13-1* and *pmei13-2* seeds  
316 presented thinner AM layers compared with wild-type, whereas the area of mucilage  
317 halos of *pmei15-1* and *pmei15-2* seeds showed no significant difference from wild-type  
318 (Supplemental Figure 9A to D). Compared to wild-type, DM of seed mucilage decreased  
319 significantly in *pmei13-1* seeds, but not in *pmei15-1* seeds (Supplemental Figure 9E). We  
320 also performed PME activity assays on *pmei13-1* and *pmei15-1* whole seeds  
321 (Supplemental Figure 9F). Results showed that, consistent with the decreased DM,  
322 *pmei13-1* presents a significant increase in PME activity compared to wild-type.  
323 However, no significant difference was observed between *pmei15-1* and wild-type,  
324 suggesting that the function of *PMEI15* might be minimal, if any, in seed mucilage  
325 maturation.

#### 326 **Role of ERF4 in DM modification is mediated by *PMEI13*, *14*, *15* and *SBT1.7***

327 Genetic interactions between *ERF4* and *PMEI13*, *14*, *15* or *SBT1.7* in modulating DM  
328 were studied by generating *erf4-2 pmei13-1*, *erf4-2 pmei14*, *erf4-2 pmei15-1* and *erf4-2*  
329 *sbt1.7* double mutant lines. In line with our findings that *PMEI13*, *14*, *15* are downstream  
330 targets of ERF4 with enhanced expression in the *erf4-2* seeds, both *pmei13-1* and *pmei14*  
331 single mutations, but not the *pmei15-1* single mutation, partially rescued the mucilage  
332 phenotype and the reduction of PME activity in *erf4-2* seeds (Supplemental Figure 9C to  
333 F). However, *erf4-2 sbt1.7* seeds resembled *sbt1.7* single mutant in mucilage extrusion  
334 phenotype and PME activity. Consistent with the observed phenotype, the DM of *erf4-2*  
335 *pmei13-1* and *erf4-2 pmei14* double mutant seeds was also partially restored to wild-type  
336 levels compared to *erf4-2*, whereas *erf4-2 sbt1.7* seeds had a compromised DM which  
337 was between *erf4-2* and *sbt1.7*, but was still significantly decreased compared to  
338 wild-type (Supplemental Figure 9E).

---

### 339 **ERF4 physically interacts with MYB52**

340 Our previous study has shown that MYB52 could directly activate *PMEI6*, *14* and  
341 *SBT1.7* (Shi et al., 2018). In this work, we have demonstrated that ERF4 directly  
342 suppresses *PMEI14* and *SBT1.7*. These findings led us to explore the relationships  
343 between the ERF4 and MYB52 transcription factors. Firstly, qRT-PCR was performed to  
344 determine the change of expression levels for *ERF4* and *MYB52* in *myb52* and *erf4-2*  
345 seeds, respectively. Whereas expression of *MYB52* in *erf4-2* was unaltered (Supplemental  
346 Figure 7B), *ERF4* expression was increased in *myb52* (Figure 2G). We next examined  
347 *cis*-acting elements in the *ERF4* promoter and found three MYB binding sites (MBS).  
348 However, MYB52 did not directly bind to these MBS motifs in our EMSA and CHIP  
349 assays (data not shown). These results suggest that ERF4 and MYB52 do not directly  
350 regulate each other at a transcriptional level.

351 Nevertheless, ERF4 and MYB52 might still regulate each other's function through direct  
352 protein-protein interaction. To verify this hypothesis, we performed a GST pull-down  
353 assay to verify whether these two transcription factors can interact. As expected, purified  
354 MBP-ERF4 fusion protein was pulled down when incubated with GST-tagged MYB52  
355 (GST-MYB52) using anti-MBP antibodies (Figure 4A). No band was detected in the  
356 immunoblotting analysis when pull-down was executed with the GST tag alone,  
357 suggesting that the interaction between ERF4 and MYB52 is specific. To determine  
358 whether ERF4 and MYB52 interact *in vivo*, co-immunoprecipitation (co-IP) assays were  
359 performed using Arabidopsis protoplasts transformed with *35S::MYB52-Myc* and  
360 *35S::ERF4-Flag* constructs. The results showed that MYB52-Myc was identified using  
361 the anti-Myc antibody when the protein extracts were immunoprecipitated with anti-flag  
362 antibody, indicating that ERF4 and MYB52 interact in plant cells (Figure 4B). Lastly, to  
363 further assure the interaction between ERF4 and MYB52 *in planta*, we conducted a  
364 bimolecular fluorescence complementation (BiFC) assay in Arabidopsis protoplasts  
365 (Figure 4C). ERF4-YC and YN-MYB52 co-expression could reconstitute YFP

---

366 fluorescence. In contrast, co-expression of ERF4-YC with the YFP N-terminus or YFP  
367 C-terminus with YN-MYB52 or the YFP C-terminus and N-terminus alone did not show  
368 any fluorescence signal. Moreover, the BiFC results also showed that the interaction  
369 between ERF4 and MYB52 occurs in the nucleus.

370 **ERF4 and MYB52 antagonize each other's activity in regulating pectin**  
371 **de-methylesterification related genes**

372 To test whether the ERF4-MYB52 interaction affects the binding of ERF4 to *PMEI13*, *14*,  
373 *15* and *SBT1.7*, EMSA assays were performed with purified MBP-ERF4 and  
374 GST-MYB52 fusion proteins and biotin labelled probes that only contain the GCC-box  
375 motif. Results showed that ERF4 alone bound to the DNA probes containing GCC-box  
376 (Figure 5A to D, lane 3), while MYB52 did not (Figure 5A to D, lane 2), and when the  
377 amount of MYB52 was added increasingly, the binding of ERF4 to these probes  
378 gradually weakened (Figure 5A to D, lane 4 to 6). To investigate how the ERF4-MYB52  
379 interaction affects their transcriptional activity, an effector plasmid of *35S::MYB52* was  
380 additionally constructed, and dual-LUC transient transcriptional activity assays were  
381 performed in Arabidopsis protoplasts (Figure 5E). *35S::MYB52* co-transformed with  
382 either reporter plasmid showed no influence on LUC activity, indicating that MYB52 did  
383 not activate promoters containing the GCC-box motif. When *35S::ERF4* and  
384 *35S::MYB52* were co-transformed together with either reporter plasmid, the LUC activity  
385 was significantly recovered in comparison with co-transformations without *35S::MYB52*,  
386 indicating that the transcriptional suppression of ERF4 to its downstream genes was  
387 inhibited by MYB52.

388 To test whether the ERF4-MYB52 interaction affects the binding of MYB52 to the  
389 *PMEI6*, *14* and *SBT1.7* promoters as well, EMSA assays were performed as described  
390 above, but with probes only containing the MBS motif. Similarly, MYB52 alone bound to  
391 these MBS motifs (Figure 6A to C, lane 3), while ERF4 did not (Figure 6A to C, lane 2),

392 and the binding of MYB52 to these promoters gradually weakened with the increase in  
393 the amount of ERF4 added (Figure 6A to C, lane 4 to 6). Effector plasmids of *proPMEI6*,  
394 *14* or *SBT1.7::LUC* were constructed and relative LUC activities were measured. The  
395 ERF4-MYB52 interaction decreased the activating regulation of both *PMEI6*, *14* and  
396 *SBT1.7* by MYB52, compared to a single co-transformation of *35S::MYB52* with either  
397 effector plasmid (Figure 6D).

398 To further dissect the relationship between ERF4 and MYB52 in the regulation of pectin  
399 de-methylesterification, we crossed *erf4-2* and *myb52* and examined the mucilage  
400 phenotype of the *erf4-2 myb52* double mutant seeds under vigorous shaking conditions.  
401 We observed that disruption of MYB52 function restored the mucilage phenotype of the  
402 *erf4-2* mutant, and vice versa (Figure 7A and B). We also examined the expression of  
403 *PMEI6*, *13*, *14*, *15* and *SBT1.7* in developing seeds of *erf4-2 myb52*, finding that the  
404 expression of *PMEI13*, *14*, *15* was increased whereas *PMEI6* and *SBT1.7* were  
405 down-regulated compared to wild-type. However, they all presented a compromised  
406 expression pattern compared to that of *erf4-2* and *myb52*, respectively (Figure 2G).  
407 Consequently, PME activity of *erf4-2 myb52* and wild-type seeds was alike (Figure 7C),  
408 suggesting a complementary effect on DM in the *erf4-2 myb52* seed mucilage. Taken  
409 together, these results suggest that ERF4 and MYB52 play completely opposite roles in  
410 the same pathway in regulating pectin de-methylesterification in the seed coat mucilage.

## 411 **DISCUSSION**

### 412 ***ERF4* plays a regulatory role in seed coat mucilage development**

413 The seed coat epidermal differentiation starts after fertilization and proceeds until the  
414 mature green stage, corresponding to 0~13 DPA (Francoz et al., 2015; Golz et al., 2018).  
415 The *ERF4* expression is gradually increased during this differentiation phase, and peaks  
416 at 13 DPA (Figure 1A). At this point in seed development, mucilage synthesis is complete  
417 and structural modifications may occur (Francoz et al., 2015; Hu et al., 2016). Since its



---

418 expression in pod is barely detectable, the detected *ERF4* transcripts are mainly from  
419 developing seeds. *ERF4* expression in the seed coat has been demonstrated in a global  
420 gene expression dataset (Le et al., 2010). We also observed that it is indeed strongly  
421 expressed in epidermal cells of the seed coat, which can be observed with GUS staining  
422 (Supplemental Figure 2J and K).

423 Although *ERF4* has diverse functions in plant growth and development (Koyama et al.,  
424 2013; Liu et al., 2017; McGrath et al., 2005; Zhou et al., 2016), its role in cell wall  
425 organization has not yet been reported. The spatio-temporal expression patterns of *ERF4*  
426 were in agreement with a possible role in mucilage polysaccharides organization during  
427 seed development. As expected, we found a modified distribution of the seed mucilage,  
428 from adherent to soluble, in the *erf4* mutants (Figure 1E and F; Supplemental Table 1),  
429 which is the result of reduced PME activity (Figure 2E and F) along with increased HG  
430 methylesterification level (Figure 2A). As the DM of HG domains is supposed to play  
431 significant roles in mucilage RG-I solubility (Saez-Aguayo et al., 2013), these results  
432 therefore indicate that *ERF4* is involved in post-deposition modification of the seed  
433 mucilage polysaccharides by modulating PME activity.

434 ***ERF4* positively modulates HG de-methylesterification by suppressing *PMEI13, 14,***  
435 ***15* and *SBT1.7***

436 Pectin is synthesized in the Golgi apparatus with HGs in a fully methylesterified status  
437 (Pelloux et al., 2007; Turbant et al., 2016). The de-methylesterification by PMEs is  
438 considered to facilitate the formation of the “egg-box” structures between HG molecules  
439 and  $\text{Ca}^{2+}$ , which is deemed to be associated with an increase in cell wall rigidity (Micheli,  
440 2001; Pelloux et al., 2007; Willats et al., 2001a; Willats et al., 2001b; Wolf et al., 2009).  
441 The DM in the *erf4* seed mucilage was increased by 10~20% compared to wild-type  
442 (Figure 2A), which was confirmed in our immunolabeling assays with increased JIM7  
443 labelling in contrast to weakened JIM5 and CCRC-M38 signals (Figure 2B to D). These

---

444 results indicate that HG de-methylesterification was inhibited because of the *ERF4*  
445 mutation, which might lead to a theoretical decrease in the formation of the “egg-box”  
446 structures as verified by 2F4 labelling (Supplemental Figure 5). Thus, at first sight, high  
447 level of DM due to the *ERF4* mutation might be associated with a decrease in cell wall  
448 rigidity, with consequences on the low cohesiveness of adherent mucilage to the seed coat.  
449 Pre-treatment of *pmei6*, *sbt1.7*, *luh/mum1*, *stk* and *myb52* seeds with EDTA, a Ca<sup>2+</sup>  
450 chelator, can promote mucilage extrusion or repartition, because EDTA can destroy the  
451 calcium bridge and thus decrease adherence of the inner layer to the seed coat. However,  
452 pre-treatment of *erf4* seeds with EDTA has no effects on mucilage partitioning compared  
453 to wild-type (Figure 1G; Supplemental Figure 3H). These results indicate that the lost  
454 outer part of the *erf4* adherent mucilage in water is insensitive to EDTA extraction.

455 We proved that the elevated DM was due to a decrease in PME activity (Figure 2E and F).  
456 Considering that ERF4 is a transcription repressor (Yang et al., 2005), the reduced PME  
457 activity might result from direct up-regulation of rival genes, such as *PMEIs*. We showed  
458 that ERF4 suppresses the expression of *PMEI13*, *14*, *15* and *SBT1.7* by directly binding  
459 to their regulatory elements that locate in the promoter, intron or exon both *in vitro* and *in*  
460 *vivo* (Figure 3). In most cases, transcription factors regulate gene expression by binding  
461 *cis*-acting elements that locate in its promoter or intron. However, *cis*-elements located in  
462 exon region were also reported (de Vooght et al., 2008). As *PMEI13*, *14*, *15* and *SBT1.7*  
463 are all inhibitors of PME activity, we concluded that the reduced PME activity is due to  
464 transcriptional up-regulation of these genes in the *erf4* seeds. Genetic evidence that *erf4-2*  
465 *pmei13-1* and *erf4-2 pmei14* double mutants showed partially rescued mucilage  
466 phenotype further proved that ERF4 functions upstream of *PMEI13*, *14* (Supplemental  
467 Figure 9). Attributing to the enormous effect of the *SBT1.7* in DM modification, the  
468 *erf4-2 sbt1.7* double mutant seeds resemble *sbt1.7* in mucilage extrusion. We can also  
469 conjecture that *SBT1.7* is not primarily regulated by ERF4. Moreover, we cannot exclude  
470 the contributions of other *PMEI* genes to the *erf4* mucilage phenotype (such as *PMEI6*,

---

471 *ATIG11593*, etc.), since their expressions were also up-regulated in the *erf4* seeds  
472 (Supplemental Figure 7A).

473 *PMEI6*, *14*, *PME58*, *FLY1* and *SBT1.7* have been proved to be involved in HG  
474 de-methylesterification in the seed coat mucilage (Rautengarten et al., 2008;  
475 Saez-Aguayo et al., 2013; Shi et al., 2018; Turbant et al., 2016; Voiniciuc et al., 2013). In  
476 this study, we showed that *PMEI13* and *PMEI15* play a role in HG  
477 de-methylesterification in the seed mucilage, although *PMEI15* might play only a  
478 supporting role (Supplemental Figure 9). The transcriptional regulation network of HG  
479 de-methylesterification is also partially elaborated, although it is just the tip of the iceberg.  
480 LUH/MUM1, STK and MYB52, either positive or negative regulator of mucilage pectin  
481 methylesterification modification, are transcriptionally associated with each other in  
482 regulating DM related genes (Shi et al., 2018). In this study, we showed that ERF4  
483 functions in regulating HG de-methylesterification by suppressing *PMEI13*, *14*, *15* and  
484 *SBT1.7*. In addition, *ERF4* expression was suppressed by MYB52, STK and  
485 LUH/MUM1 in our qRT-PCR analysis (Figure 2G). The above results suggest that during  
486 seed mucilage maturation, the regulatory network underlying pectin  
487 de-methylesterification is more complex than expected.

#### 488 **Possible influences of PME activity on seed development**

489 Plant cell growth is regulated by the interplay between the intracellular turgor pressure  
490 and the flexibility of the cell wall. Many plant cell wall-modifying enzymes, such as  
491 PMEs and PME inhibitors play important roles in cell wall reorganization for control of a  
492 variety of growth processes (Levesque-Tremblay et al. 2015b), including fruit ripening  
493 (Reca et al., 2012), cell elongation (Derbyshire et al., 2007; Guenin et al., 2011), stress  
494 responses (Bethke et al., 2014; Lionetti et al., 2007) and mediating unilateral  
495 cross-incompatibility (Zhang et al., 2018).

496 The functional roles of pectin methylesterification in regulating seed growth and seed

---

497 size have also been reported. For example, Arabidopsis plants overexpressing *PMEI5*  
498 showed a significant enlargement of seed size (Muller et al., 2013). *stk* seeds presented a  
499 reduced seed size phenotype accompanied with elevated PME activity (Ezquer et al.,  
500 2016). These findings indicate that pectin de-methylesterification is negatively correlated  
501 with seed growth. Conversely, mutants of PME encoding genes, *hms* and *pme58*,  
502 displayed a reduced cell size in the embryo and seed epidermal cells which is a  
503 consequence of lack of cell expansion (Levesque-Tremblay et al., 2015a; Turbant et al.,  
504 2016). In this study, we found that both seed size and mucilage-producing cell surface  
505 area of *35S::ERF4* were increased compared to wild-type seeds (Supplemental Figure 6).  
506 Collectively, higher DM might be correlated with smaller seed size in the cases of  
507 *35S::ERF4*, *hms* and *pme58* mutants, but not in *stk* and *35S::PMEI5* seeds.

508 Previous studies have established a complex relationship between DM and plant growth  
509 processes. It has been demonstrated that higher level of DM seems to be able to either  
510 promote or inhibit cell expansion and organ growth (Wormit and Usadel, 2018). For  
511 instances, overexpressing *AtPMEI2* resulted in enhanced root elongation, whereas  
512 *AtPMEI4* and *OsPMEI28* overexpressors have delayed hypocotyl growth rate and  
513 restrained culm elongation, respectively (Nguyen et al., 2016; Pelletier et al., 2010;  
514 Rockel et al., 2008). Opposed to *AtPME1* which inhibits pollen tube growth, Arabidopsis  
515 *VANGUARDI* is required for the growth of pollen tubes (Jiang et al., 2005). Pectin  
516 de-methylesterification manipulated by *AtPME5* also contributes to an increase in  
517 elasticity of the shoot apical meristem (Peaucelle et al., 2011). These findings suggest that  
518 PME activity could be tightly controlled to fine-tune pectin's biophysical properties in the  
519 cell walls of certain organs, resulting in different modes of action of DM in the  
520 development of different organs. In summary, we conjectured that pectin  
521 de-methylesterification catalyzed by PMEs could either promote or inhibit cell expansion  
522 in developing seeds, which might be correlated with the modification patterns/degree of  
523 the cell wall. Future studies are needed to elucidate the correlations between these

524 patterns resulting from cell wall-modifying enzymes and the flexibility of the plant cell  
525 wall structure, and how they affect cell expansion.

526 **ERF4 and MYB52 antagonistically regulate pectin de-methylesterification in the**  
527 **seed mucilage**

528 In eukaryotes, transcription factors usually work in combination which can promote or  
529 inhibit each other's transcriptional activity in controlling expression of target genes. For  
530 example, the BRC1 transcriptional activity is suppressed by interaction with the  
531 transcriptional repressor TIE1 in Arabidopsis (Yang et al., 2018); the interaction between  
532 MdMYC2 and MdERF2 not only inhibits the binding of MdERF2 to *MdACS1*, but also  
533 prevents MdMYC2 from binding to *MdACS1* and *MdACO1* in apple (Li et al., 2017); and  
534 during crown root elongation, the WOX11-ERF3 interaction either enhances  
535 WOX11-mediated repression or inhibits ERF3-mediated activation of *RR2* in rice (Zhao  
536 et al., 2015). Here, we provided evidence for an interaction between ERF4 and MYB52  
537 (Figure 4). One effect of this interaction might be on the regulation of ERF4 to its  
538 downstream genes. We showed that the presence of MYB52 inhibits the binding of ERF4  
539 to *PMEI13*, *14*, *15* and *SBT1.7* and enhanced their transcription activity (Figure 5),  
540 indicating that the ERF4-MYB52 interaction represses the transcriptional suppression of  
541 ERF4 to *PMEI13*, *14*, *15* and *SBT1.7*, thereby decreasing PME activity in the seed coat  
542 mucilage. We also observed that the ERF4-MYB52 interaction prevents the binding of  
543 MYB52 to *PMEI6*, *14* and *SBT1.7* promoters, and reduces its activating regulation  
544 (Figure 6), suggesting that this interaction suppresses the binding of MYB52 to the  
545 *PMEI6*, *14* and *SBT1.7* promoters, thereby enhancing PME activity in the seed mucilage.

546 From these downstream targets of the ERF4-MYB52 transcriptional complex, *PMEI13*  
547 and *PMEI15* have GCC-box as well as MBS motifs in their promoters, but MYB52 did  
548 not recognize these MBS motifs in our study by both EMSA and ChIP assays (data not  
549 shown), whereas *PMEI6* only has one MBS in its promoter. However, in our qRT-PCR

---

550 experiments, the expression of *PMEI6* was up-regulated in *erf4-2*, and the *PMEI13*, *15*  
551 transcripts were decreased in *myb52* (Figure 2G). We reasoned that another effect of the  
552 ERF4-MYB52 interaction might be the indirect transcriptional regulation of these genes,  
553 that MYB52 promotes *PMEI13* and *PMEI15* expression by inhibiting the transcriptional  
554 suppression activity of ERF4, and ERF4 suppresses *PMEI6* expression by antagonizing  
555 the function of MYB52.

556 The reciprocal transcriptional inhibition between ERF4 and MYB52 provides insights  
557 into the mechanisms that plants use to maintain the appropriate DM, to further regulate  
558 plasticity of the cell wall structure in the seed mucilage. It was further verified by genetic  
559 evidence that PME activity and mucilage release of the *erf4-2 myb52* double mutant are  
560 almost identical to those of wild-type (Figure 7A to C). Moreover, according to the  
561 expression patterns of downstream genes in *erf4-2*, *myb52* and *erf4-2 myb52* (Figure 2G),  
562 we conjectured that for the ERF4-MYB52 transcriptional complex *PMEI13*, *14*, *15* could  
563 be mainly regulated by ERF4 whereas *PMEI6* and *SBT1.7* could be mainly under positive  
564 regulation of MYB52, although other transcription factors might also be involved. A  
565 model for the role of the ERF4-MYB52 complex in the regulation of pectin  
566 de-methylesterification was proposed (Figure 7D): (1) ERF4 and MYB52 interact and  
567 suppress each other's transcriptional activity; (2) ERF4 negatively regulates *PMEI13*, *14*,  
568 *15* and *SBT1.7* expression by directly binding to their regulatory elements and suppresses  
569 *PMEI6* indirectly by antagonizing MYB52 function, giving rise to positive regulation of  
570 pectin de-methylesterification; (3) MYB52 activates *PMEI6*, *14* and *SBT1.7* by directly  
571 binding to their promoters and positively regulates *PMEI13*, *15* expression indirectly by  
572 suppressing ERF4 activity, which in turn negatively regulates pectin  
573 de-methylesterification in the seed mucilage. Taken together, these findings show a  
574 compensatory effect on overall degree of HG methylesterification, where ERF4 and  
575 MYB52 antagonistically modulate the structure of adherent mucilage by regulating genes  
576 involved in HG de-methylesterification in the seed coat mucilage.

## 577 **METHODS**

### 578 **Plant materials and growth conditions**

579 The Arabidopsis T-DNA insertion lines *erf4-1* (SALK\_200761), *erf4-2* (SALK\_073394),  
580 *myb52* (SALK\_138624), *pmei13-1* (GABI-601A06), *pmei13-2* (SALK\_038767), *pmei14*  
581 (SALK\_206157), *pmei15-1* (SALK\_106719), *pmei15-2* (SALK\_053746) and *sbt1.7*  
582 (GABI-140B02) were obtained from Nottingham Arabidopsis Stock Centre  
583 (<http://arabidopsis.info/>). The *myb52*, *pmei14* and *sbt1.7* mutants have been described  
584 previously (Rautengarten et al., 2008; Shi et al., 2018). The Arabidopsis wild-type (Col-0  
585 ecotype) and mutant plants were grown at 22 °C under long-day (16 h light/8 h dark)  
586 conditions in a growth chamber. Double mutant was obtained by crossing *erf4-2* with  
587 either *myb52*, *pmei13-1*, *pmei14*, *pmei15-1* or *sbt1.7* single mutant. In all comparative  
588 analysis for mucilage extrusion phenotype, seeds used from mutants and wild-type plants  
589 were simultaneously cultivated and harvested.

### 590 **PCR-based genotyping**

591 Homozygous T-DNA insertion lines for all the single and double mutants were identified  
592 by PCR using primers (Supplemental Table 2) provided by T-DNA Primer Design  
593 (<http://signal.salk.edu/tdnaprimers.2.html>) with genomic DNA extracts. Plants with PCR  
594 products only obtained for the insertion border and not with primers flanking the  
595 insertion sites were regarded as homozygous lines.

### 596 **Expression analysis and GUS staining of plant tissues**

597 Total RNAs were extracted from 4 to 13 DPA developing seeds of wild-type and mutants  
598 including *erf4-2*, *myb52*, *luh*, *stk*, *pmei13*, *pmei15*, *35S::ERF4* and *erf4-2 myb52*, as well  
599 as Arabidopsis organs such as roots, seedlings, leaves and inflorescence stems using the  
600 RNeasy plant mini kit (Qiagen). Total amount of 1 µg RNA was used as template for  
601 first-strand cDNA synthesis with the oligo(dT) primer and the PrimeScript<sup>TM</sup> RT reagent

---

602 Kit with gDNA Eraser (TaKaRa) according to the manufacturer's instructions. The  
603 qRT-PCR assay was performed using 1/20 diluted cDNA as templates in the reactions  
604 containing SYBR<sup>®</sup> Premix Ex Taq<sup>™</sup> II (TaKaRa). The qRT-PCR assay was conducted in  
605 triplicate in an ABI 7500 Fast Real-Time PCR System. The relative expression of genes  
606 was calculated by normalizing against a housekeeping gene *ACTIN2* (Dekkers et al.,  
607 2012) with the  $2^{-\Delta\Delta C_T}$  method in analyzing the data. *ACTIN2* was also used as loading  
608 control in the RT-PCR analysis for detecting of transcripts.

609 The *ERF4* promoter region of 1,965 bp preceding the transcriptional start codon ATG  
610 was amplified by PCR using wild-type genomic DNA as template. After purification with  
611 the EasyPure<sup>®</sup> PCR Purification Kit (TRANSGEN BIOTECH), the PCR products were  
612 recombined into the PBI121 binary vector with *XbaI* site to generate *proERF4::GUS*.  
613 After *Agrobacterium*-mediated transformation of the Arabidopsis wild-type plants,  
614 histochemical staining of positive transformants was performed using the GUS staining  
615 kit (Solarbio) according to the manufacturer's instructions. The GUS stained tissues were  
616 examined using a stereoscopic microscope (LEICA MDG29) equipped with a Leica  
617 MC190 camera. Primers used are listed in Supplemental Table 2.

### 618 **Ruthenium red staining and morphological analysis**

619 For mucilage extrusion analysis, whole mature dry seeds were shaking by hand or in an  
620 incubator (under 28 °C, 200 rpm, 1 h conditions) in deionized water, 50 mM EDTA (pH  
621 8.0) or 0.01% (w/v) ruthenium red (RR, Sigma-Aldrich). After RR staining, seeds were  
622 rinsed in deionized water and visualized with a bright-field microscope (Nikon). The seed  
623 size and area of mucilage halos were measured with the Image J software  
624 (<https://imagej.en.softonic.com/download>). Dry seeds were mounted on stubs using an  
625 adhesive disc and then coated with platinum using a Hitachi E1045 ion sputter. The  
626 morphology of MSCs surface of mature dry seeds was investigated by scanning electron  
627 microscopy (SEM, Hitachi S4800) at an accelerating voltage of 20 kV. Measurement of



628 MSC surface areas were carried out with the Image J software, and more than 300  
629 measurements were performed. For the morphological analysis of seed coat  
630 differentiation, developing seeds at stages 7 and 10 DPA of wild-type and *erf4* were  
631 sectioned and stained with 0.5% (w/v) Toluidine Blue O (TBO) after fixing and  
632 embedding with spurr resin as described by Shi et al. (2018). The sections were  
633 visualized and photographed with a bright-field microscope (Nikon).

#### 634 **Gene cloning and plant transformation**

635 The full-length CDS of *ERF4* was amplified by PCR using wild-type genomic DNA as  
636 template and was recombined into *pCAMBIA35tleghps2#4* binary vector with *KpnI/XbaI*  
637 restriction sites to generate *35S::ERF4* overexpressing vector. The full-length CDS of  
638 *ERF4* was also recombined into a modified *pCAMBIA1300* binary vector (*35S::Myc*)  
639 with the *Kpn I* site to obtain *35S::Myc-ERF4* overexpression vector. The vectors were  
640 then introduced into the *Agrobacterium* strain GV3101 to transform the Arabidopsis  
641 wild-type or *erf4-2* mutant plants by a floral dip method to obtain overexpression and  
642 complementary lines. Positive transformants were selected on 1/2 MS medium containing  
643 25 mg L<sup>-1</sup> hygromycin or 50 mg L<sup>-1</sup> kanamycin.

#### 644 **Mucilage extraction and monosaccharide composition analysis**

645 Briefly, 5 mg mature dry seeds from wild-type or mutants with three biological replicates  
646 were placed in 2 mL tubes with 1 mL deionized water. The water-soluble mucilage was  
647 extracted in an incubator under 28 °C and 200 rpm (1 h) conditions. The seeds were  
648 washed three times, and supernatants were pooled in 10 mL glass tubes. The seeds were  
649 then treated with ultrasonic for 20 s in 1 mL deionized water to obtain adherent mucilage  
650 as described by Zhao et al., (2016). The de-mucilaged seeds were washed three times,  
651 and pooled supernatants were placed in 10 mL glass tubes. Non-adherent mucilage was  
652 also solubilized with 50 mM EDTA (pH 8.0) using the same procedure described for  
653 water extraction, whereas adherent mucilage was extracted by shaking seeds in EDTA

---

654 with the TissueLyser II (Qiagen) at 20 movements/s for 20 min. The mucilage extractions  
655 were then lyophilized with a FreeZone® freeze dryer (LABCONCO), which were used  
656 for compositional monosaccharide analysis afterwards. Pictures of RR-stained seeds  
657 post-extraction are shown in Supplemental Figure 2. To determine monosaccharide  
658 composition of both fractions, the mucilage polymers were hydrolyzed to monose with 2  
659 M trifluoroacetic acid (110 °C, 2 h) and quantified by HPLC (Waters 2695 and 2998)  
660 after 1-phenyl-3-methyl-5-pyrazolone derivatization (70 °C, 0.5 h) as described by Shi et  
661 al. (2018).

### 662 **Determination of PME activity and degree of pectin methylesterification**

663 Gel diffusion assays were performed to determine PME activity. In brief, 20 mg mature  
664 dry seeds were grounded into homogenate with mortar and pestle in 400 µL of extraction  
665 buffer (1 M NaCl, 12.5 mM citric acid, and 50 mM Na<sub>2</sub>HPO<sub>4</sub>, pH 6.5) to obtain total  
666 protein extracts. The resulting homogenate was centrifuged at 20,000 g for 15 min after  
667 shaking at 4 °C for 1h. Protein concentrations in the supernatant were determined  
668 according to the Bradford method (Bradford, 1976). Equal quantities of proteins (10 µg)  
669 in the same volume (20 µL) were loaded into 6-mm-diameter wells in 1% agarose gels  
670 containing 0.1% (w/v) of esterified citrus fruit pectin (85% esterified, Sigma-Aldrich),  
671 12.5 mM citric acid and 50 mM Na<sub>2</sub>HPO<sub>4</sub>, pH 6.5. After incubation overnight at 28 °C,  
672 the gels were stained for 45 min with 0.01% RR and washed five times in 5 h with water.  
673 The gels were photographed and the red-stained areas were quantified with the Image J  
674 software. The measurements were performed in triplicate and relative PME activity was  
675 normalized with the wild-type average area being set to 100%.

676 Water-extracted whole mucilage from 20 mg seeds by ultrasonic were used to determine  
677 DM according to Voiniciuc et al. (2013). In brief, methanol was released from mucilage  
678 by alkaline de-esterification with 2 M NaOH at 4 °C for 1 h. After neutralization of  
679 extracts with 2 M HCl, released methanol was oxidized with alcohol oxidase (0.5 U,

---

680 Sigma-Aldrich) at 25 °C for 15 min. Thereafter, a mixture containing 20 mM 2,  
681 4-pentanedione in 2 M ammonium acetate and 50 mM acetic acid was added. After  
682 incubation at 60 °C for 15 min, samples were directly cooled on ice. Absorbance at 412  
683 nm was measured with a plate reader (Tecan). The methanol content was calculated as  
684 the amount of formaldehyde produced from methanol by alcohol oxidase, by comparison  
685 with a standard calibration curve (Klavons and Bennett, 1986). Meanwhile, add 220 µL  
686 sodium tetraborate/sulfuric acid into 40 µL supernatant from the remaining mucilage  
687 saponification solution on ice before incubation at 100°C for 5 min. After being directly  
688 cooled on ice, samples are mixed with 4 µL 1.5 mg/mL M-hydroxybiphenyl. Absorbance  
689 was measured at 525 nm with a plate reader (Tecan). GalA was quantified using a  
690 D-(+)-galacturonic acid monohydrate (Sigma-Aldrich) standard curve. DM = total  
691 methanol content (µmol)/total GalA content (mg) × 100%.

## 692 **Immunolabeling assay**

693 Monoclonal antibodies CCRC-M38 (specifically recognize de-esterified HG), JIM5  
694 (specifically recognize low methylesterified HG), JIM7 (specifically recognize fully  
695 methylesterified HG) and 2F4 (specifically recognize Ca<sup>2+</sup>-linked HG dimers) were used  
696 for whole-seed immunolabelling analysis. CCRC-M38, JIM5 and JIM7 antibodies were  
697 used with PBS buffer (140 mM NaCl, 2.7 mM KCl, 8.0 mM Na<sub>2</sub>HPO<sub>4</sub>, 1.5 mM KH<sub>2</sub>PO<sub>4</sub>,  
698 pH7.4), whereas 2F4 antibody required TCS buffer (20 mM Tris-HCl pH 8.2, 0.5 mM  
699 CaCl<sub>2</sub>, 150 mM NaCl). Whole intact dry seeds were firstly blocked in 3% (w/v) fat-free  
700 milk powder in PBS/TCS buffer (MPBS/MTCS) at 37 °C for 1 h, and then labeled with  
701 10-fold MPBS/MTCS-diluted primary antibody at 37 °C for 1.5 h. Seeds were  
702 subsequently washed 3 times in PBS/TCS buffer. Then 200-fold MPBS/MTCS-diluted  
703 secondary antibody AlexaFluor488-tagged donkey anti-rat IgG (Thermofisher) antibody  
704 for JIM5 and JIM7, and a donkey anti-mouse IgG (Thermofisher) for CCRC-M38 and  
705 2F4 were used to incubate with seeds at 37 °C for 1.5 h in dark. Finally, seeds were  
706 double labeled with Calcofluor White (Sigma-Aldrich) which was diluted 5 times in

707 PBS/TCS buffer for 15 min. Images were captured by using a FluoView FV1000 spectral  
708 confocal laser microscope (OLYMPUS) with 405 and 488 nm laser.

### 709 **EMSA assay**

710 The induction and purification of proteins were described as (Yuan et al., 2014). In brief,  
711 The CDS of MYB52 was cloned into *pGEX4T-1* vector to generate GST-MYB52 fusion  
712 protein, whereas the CDS of ERF4 was cloned into *pMAL-C2X* vector in order to  
713 generate MBP-ERF4 fusion protein. The resulting plasmids were separately transformed  
714 into *Escherichia coli* strain BL21 for induction of fusion proteins. Empty *pGEX4T-1* and  
715 *pMAL-C2X* vectors were also transformed to obtain GST and MBP tags for control  
716 experiments. The concentration of isopropyl  $\beta$ -D-thiogalactoside (IPTG) for protein  
717 induction was 0.5 mM. The purification of GST tag or GST-MYB52 fusion protein was  
718 performed using a GST-tag Protein Purification Kit (Beyotime, P2262) with the  
719 BeyoGold™ GST-tag Purification Resin according to the user guide. The purification of  
720 MBP tag or MBP-ERF4 fusion protein was performed with the PurKine MBP-Tag  
721 Protein Purification Kit (Dextrin) as recommended by the manufacturer. Oligonucleotide  
722 probes were synthesized with their 5'-end being labelled with biotin. To prepare double  
723 strand probes, forward and reverse oligonucleotide probes were heated at 95 °C for 5 min  
724 in annealing buffer, and then naturally cooled to room temperature. The EMSA assay was  
725 performed using a LightShift™ Chemiluminescent EMSA Kit (ThermoFisher) according  
726 to instructions recommended by the manufacturer. All primers and oligonucleotide  
727 probes used were listed in Supplemental Table 2.

### 728 **ChIP-qPCR assay**

729 About 2 g of immature siliques at 10-13 DPA stage were collected from wild-type and  
730 *pro35S::Myc-ERF4* or *pro35S::Myc-MYB52* transgenic plants with three repeats. After  
731 washing two times with ddH<sub>2</sub>O, siliques were fixed in 37 mL 1% formaldehyde in  
732 vacuum for 10 min. After termination of the crosslinking with 2.5 mL 2 M Glycine,

---

733 samples were ground to a fine powder in liquid nitrogen. Immunoprecipitation of  
734 chromatin was performed as previously described (Gendrel et al., 2005) with anti-Myc  
735 antibody (Abcam). The precipitated DNA was recovered and the enrichment of DNA  
736 fragments in the immunoprecipitated chromatin were quantified by qPCR analysis using  
737 primers listed in Supplemental Table 2.

### 738 **Dual-luciferase transient transcriptional activity assay**

739 The modified *pBI221* vector which removed the *GUS* reporter gene between the *KpnI*  
740 and *BamHI* sites was used to create the effector constructs of *pro35S::ERF4* and  
741 *pro35S::MYB52* with the CDS of *ERF4* and *MYB52*. To generate *proPMEI13::LUC*,  
742 *proPMEI14i::LUC*, *proPMEI15::LUC*, *proSBT1.7e::LUC*, *proPMEI14::LUC*,  
743 *proPMEI6::LUC* and *proSBT1.7::LUC* reporter plasmids, genomic DNA sequences  
744 containing the GCC-box or MBS motifs of the *PMEI13* promoter (2,652 bp), *PMEI14*  
745 intron (1,575 bp) and promoter (1,047 bp), *PMEI15* promoter (1,188 bp), *SBT1.7* exon  
746 (1,186 bp) and promoter (893 bp) and *PMEI6* promoter (1,998 bp) were cloned into *Hind*  
747 *III* and *BamHI* sites of the *pGreenII-0800* vector. The empty vector was used as negative  
748 control. Dual-luciferase transient assays were performed in *Arabidopsis* mesophyll  
749 protoplasts from 4-week old plants. The ratio between LUC and REN activity was  
750 measured with three biological replicates.

### 751 **GST pull-down assay**

752 Pull-down experiments were performed with the purified GST-MYB52 and MBP-ERF4  
753 fusion proteins. Purified GST and MBP tag were used as negative controls. The purified  
754 GST tag or GST-MYB52 fusion protein were used as bait after removing of reduced  
755 glutathione. After binding of GST tag or GST-MYB52 to Glutathione Sepharose 4B resin,  
756 purified MBP tag or MBP-ERF4 fusion protein were additionally added to the column  
757 and incubated at 4 °C for 1 h on a rotator, then unbound proteins were washed away with  
758 the Binding Buffer. The bound proteins were fractionated on 10% SDS-PAGE gel after

759 boiled in water for 5 min. Western blot was performed as described (Yuan et al., 2014)  
760 with an anti-MBP antibody (Abcam).

#### 761 **Co-IP assay**

762 The co-IP experiments were performed as described (Yao et al., 2017). Briefly, The CDS  
763 of *MYB52* and *ERF4* were individually introduced into *pCAMBIA1307-Myc* and  
764 *pCAMBIA1307-Flag* vectors to generate *pro35S::MYB52-Myc* and *pro35S::ERF4-Flag*.  
765 Different combinations of plasmids were transformed into the Arabidopsis mesophyll  
766 protoplasts. The transformed cells were cultured at 22 °C for 16 h, prior to harvest for  
767 protein extraction. The anti-Myc antibody (Abcam) and protein A+G agarose beads were  
768 used to precipitate the MYB52-Myc and ERF4-Flag complex. Proteins were fractionated  
769 on 10% SDS-PAGE gel after boiled in water for 5 min for use in immunoblot analysis  
770 with the anti-Flag antibody (Sigma-Aldrich).

#### 771 **BiFC assay**

772 The BiFC experiments were performed as described (Wang et al., 2019). Briefly, the  
773 CDS of *ERF4* was fused with the C-terminal of the yellow fluorescent protein (YFP) in  
774 *pE3242* vector to generate *pro35S::ERF4-YC*, and that of *MYB52* was fused with the  
775 N-terminal of YFP in *pE3228* vector in order to generate *pro35S::YN-MYB52*. The  
776 constructed plasmids were transformed into Arabidopsis mesophyll protoplasts in  
777 different combinations. The transfected cells were incubated in dark for 12 to 16 h.  
778 Images were captured by using a FluoView FV1000 spectral confocal laser microscope  
779 (OLYMPUS). The YFP was observed with the 514 nm laser. DAPI was observed with  
780 the 358 nm laser. Chloroplast (CHI) auto-fluorescence was observed with the 488 nm  
781 laser.

#### 782 **Accession Numbers**

783 Sequence data used in this study can be found in The Arabidopsis Information Resource  
784 (TAIR; <https://www.arabidopsis.org>) under the following accession numbers: ERF4  
785 (At3g15210), MYB52 (At1g17950), LUH/MUM1 (At2g32700), STK (At4g09960),  
786 PME16 (At2g47670), PME13 (At4g15750), PME14 (At1g56100), PME15  
787 (At3g05741), SBT1.7 (At5g67360) and ACTIN2 (At3g18780).

## 788 **Supplemental Data**

789 **Supplemental Figure 1.** Expression pattern of *ERF4*, *PME13*, *PME14*, *PME15* and  
790 *SBT1.7* during Arabidopsis plant development.

791 **Supplemental Figure 2.** GUS activity analysis of the *ERF4* promoter.

792 **Supplemental Figure 3.** Seed coat morphology analysis and RR stained mucilage halos  
793 after water and EDTA extraction.

794 **Supplemental Figure 4.** Complementation of *erf4-2* with the *35S::ERF4* construct.

795 **Supplemental Figure 5.** A decreased 2F4 labelling was detected for *erf4-2* seeds  
796 compared to that of wild-type.

797 **Supplemental Figure 6.** Phenotypes of the *35S::ERF4* overexpressors.

798 **Supplemental Figure 7.** Relative expression of DM related genes in *erf4-2* and  
799 *35S::ERF4* overexpressors compared to wild-type.

800 **Supplemental Figure 8.** The transcriptional suppression of *ERF4* to *SBT1.7* was  
801 abolished by point mutation in the GCC-box motif that locates in its exon.

802 **Supplemental Figure 9.** Roles of *PME13* and *PME15* in mucilage maturation and  
803 genetic interactions between *ERF4* and its downstream targets.

804 **Supplemental Table 1.** Composition of sequentially extracted mucilage for wild-type  
805 and *erf4* seeds.

806 **Supplemental Table 2.** Primers used for genotype identification.

807 **Supplemental Table 3.** Primers used for qRT-PCR and RT-PCR analysis.

808 **Supplemental Table 4.** Primers used for vector construction.

809 **Supplemental Table 5.** Probes used in EMSA experiments.

## 810 **ACKNOWLEDGMENTS**

811 This work was supported by the National Natural Science Foundation of China (project  
812 No. 31670302, 31600237 and 31470291), the Agricultural Science and Technology  
813 Innovation Program (ASTIP-TRIC02), the National Key Technology R&D Program  
814 (2015BAD15B03-05), the Elite Youth Program of CAAS (to Yingzhen Kong) and the  
815 Taishan Scholar Program of Shandong (to Gongke Zhou).

## 816 **AUTHOR CONTRIBUTIONS**

817 Yingzhen Kong and Anming Ding designed the research. Anming Ding, Xianfeng Tang,  
818 Linhe Han, Jianlu Sun, Angyan Ren, Jinhao Sun, Zongchang Xu and Ruibo Hu each  
819 performed some of the experiments. All authors analyzed the data. Anming Ding wrote  
820 the paper. Gongke Zhou and Yingzhen Kong revised the manuscript.

821



---

822 **References**

- 823 **Arsovski, A.A., Haughn, G.W., and Western, T.L.** (2010). Seed coat mucilage cells of  
824 *Arabidopsis thaliana* as a model for plant cell wall research. *Plant Signal Behav* **5**,  
825 796-801.
- 826 **Bethke, G., Grundman, R.E., Sreekanta, S., Truman, W., Katagiri, F., and**  
827 **Glazebrook, J.** (2014). *Arabidopsis* PECTIN METHYLESTERASEs contribute  
828 to immunity against *Pseudomonas syringae*. *Plant Physiol* **164**, 1093-1107.
- 829 **Bradford, M.M.** (1976). A rapid and sensitive method for the quantitation of microgram  
830 quantities of protein utilizing the principle of protein-dye binding. *Analytical*  
831 *Biochem* **72**, 248-254.
- 832 **de Vooght, K.M., van Wijk, R., and van Solinge, W.W.** (2008). GATA-1 binding site in  
833 exon1 direct erythroid-specific transcription of PPOX. *Gene* **409**, 83-91.
- 834 **Dekkers, B.J., Willems, L., Bassel, G.W., van Bolderen-Veldkamp, R.P., Ligterink,**  
835 **W., Hilhorst, H.W., and Bentsink, L.** (2012). Identification of reference genes  
836 for RT-qPCR expression analysis in *Arabidopsis* and tomato seeds. *Plant Cell*  
837 *Physiol* **53**, 28-37.
- 838 **Derbyshire, P., McCann, M.C., and Roberts, K.** (2007). Restricted cell elongation in  
839 *Arabidopsis* hypocotyls is associated with a reduced average pectin esterification  
840 level. *BMC Plant Biol* **7**, 31.
- 841 **Ehlers, K., Bhide, A.S., Tekleyohans, D.G., Wittkop, B., Snowdon, R.J., and Becker,**  
842 **A.** (2016). The MADS Box Genes ABS, SHP1, and SHP2 Are Essential for the  
843 Coordination of Cell Divisions in Ovule and Seed Coat Development and for  
844 Endosperm Formation in *Arabidopsis thaliana*. *PLoS One* **11**, e0165075.
- 845 **Ezquer, I., Mizzotti, C., Nguema-Ona, E., Gotte, M., Beauzamy, L., Viana, V.E.,**  
846 **Dubrulle, N., Costa de Oliveira, A., Caporali, E., Koroney, A.S., Boudaoud,**  
847 **A., Driouich, A., and Colombo, L.** (2016). The Developmental Regulator  
848 SEEDSTICK Controls Structural and Mechanical Properties of the *Arabidopsis*  
849 Seed Coat. *Plant Cell* **28**, 2478-2492.
- 850 **Fan, Z.Q., Kuang, J.F., Fu, C.C., Shan, W., Han, Y.C., Xiao, Y.Y., Ye, Y.J., Lu, W.J.,**  
851 **Lakshmanan, P., Duan, X.W., and Chen, J.Y.** (2016). The Banana  
852 Transcriptional Repressor MaDEAR1 Negatively Regulates Cell Wall-Modifying  
853 Genes Involved in Fruit Ripening. *Front Plant Sci* **7**, 1021.
- 854 **Francoz, E., Ranocha, P., Burlat, V., and Dunand, C.** (2015). *Arabidopsis* seed  
855 mucilage secretory cells, regulation and dynamics. *Trends Plant Sci* **20**, 515-524.
- 856 **Fujimoto, S.Y., Ohta, M., Usui, A., Shinshi, H., and Ohme-Takagi, M.** (2000).  
857 *Arabidopsis* ethylene-responsive element binding factors act as transcriptional  
858 activators or repressors of GCC box-mediated gene expression. *Plant Cell* **12**,  
859 393-404.
- 860 **Gendrel, A.V., Lippman, Z., Martienssen, R., and Colot, V.** (2005) Profiling histone  
861 modification patterns in plants using genomic tiling microarray. *Nat method* **2**,  
862 213-218.

- 863 **Golz, J.F., Allen, P.J., Li, S.F., Parish, R.W., Jayawardana, N.U., Bacic, A., and**  
864 **Doblin, M.S.** (2018). Layers of regulation-Insights into the role of transcription  
865 factors controlling mucilage production in the Arabidopsis seed coat. *Plant Sci*  
866 **272**, 179-192.
- 867 **Griffiths, J.S., Crepeau, M.J., Ralet, M.C., Seifert, G.J., and North, H.M.** (2016).  
868 Dissecting Seed Mucilage Adherence Mediated by FEI2 and SOS5. *Front Plant*  
869 *Sci* **7**, 1073.
- 870 **Guenin, S., Mareck, A., Rayon, C., Lamour, R., Assoumou Ndong, Y., Domon, J.M.,**  
871 **Senechal, F., Fournet, F., Jamet, E., Canut, H., Percoco, G., Mouille, G.,**  
872 **Rolland, A., Rusterucci, C., Guerineau, F., Wuytswinkel, O.V., Gillet, F.,**  
873 **Driouich, A., Lerouge, P., Gutierrez, L., and Pelloux, J.** (2011). Identification  
874 of pectin methylesterase 3 as a basic pectin methylesterase isoform involved in  
875 adventitious rooting in Arabidopsis thaliana. *New Phytol* **192**, 114-126.
- 876 **Haughn, G.W., and Western, T.L.** (2012). Arabidopsis Seed Coat Mucilage is a  
877 Specialized Cell Wall that Can be Used as a Model for Genetic Analysis of Plant  
878 Cell Wall Structure and Function. *Front Plant Sci* **3**, 64.
- 879 **Hu, R., Li, J., Wang, X., Zhao, X., Yang, X., Tang, Q., He, G., Zhou, G., and Kong, Y.**  
880 (2016). Xylan synthesized by Irregular Xylem 14 (IRX14) maintains the structure  
881 of seed coat mucilage in Arabidopsis. *J Exp Bot* **67**, 1243-1257.
- 882 **Huang, J., DeBowles, D., Esfandiari, E., Dean, G., Carpita, N.C., and Haughn, G.W.**  
883 (2011). The Arabidopsis transcription factor LUH/MUM1 is required for  
884 extrusion of seed coat mucilage. *Plant Physiol* **156**, 491-502.
- 885 **Jiang, L.X., Yang, S.L., Xie, L.F., Puah, C.S., Zhang, X.Q., Yang, W.C., Sundaresan,**  
886 **V., and Ye, D.** (2005). VANGUARD1 encodes a pectin methylestrase that  
887 enhance pollen tube growth in the Arabidopsis style and transmitting tract. *Plant*  
888 *Cell* **17**, 584-596.
- 889 **Jofuku, K.D., den Boer, B.G.W., Montagu, M.V., and Okamuro, J.K.** (1994). Control  
890 of Arabidopsis flower and seed development by the homeotic gene APETALA2.  
891 *Plant Cell* **6**, 1211-1225.
- 892 **Klavons, J.A., and Bennett, R.D.** (1986). Determination of methanol using alcohol  
893 oxidase and its application to methyl ester content of pectins. *Journal of*  
894 *Agricultural and Food Chemistry* **34**, 597-599.
- 895 **Klepikova, A.V., Kasianov, A.S., Gerasimov, E.S., Logacheva, M.D., and Penin, A.A.**  
896 (2016). A high resolution map of the Arabidopsis thaliana developmental  
897 transcriptome based on RNA-seq profiling. *Plant J* **88**, 1058-1070.
- 898 **Koyama, T., Nii, H., Mitsuda, N., Ohta, M., Kitajima, S., Ohme-Takagi, M., and**  
899 **Sato, F.** (2013). A regulatory cascade involving class II ETHYLENE RESPONSE  
900 FACTOR transcriptional repressors operates in the progression of leaf senescence.  
901 *Plant Physiol* **162**, 991-1005.
- 902 **Le, B.H., Cheng, C., Bui, A.Q., Wagmaister, J.A., Henry, K.F., Pelletier, J., Kwong,**  
903 **L., Belmonte, M., Kirkbride, R., Horvath, S., Drews, G.N., Fischer, R.L.,**

- 904 **Okamuro, J.K., Harada, J.J., and Goldberg, R.B.** (2010). Global analysis of  
905 gene activity during Arabidopsis seed development and identification of  
906 seed-specific transcription factors. *Proc Natl Acad Sci* **107**, 8063-8070.
- 907 **Lekawska-Andrinopoulou, L., Vasiliou, E.G., Georgakopoulos, D.G., Yialouris, C.P.,**  
908 **and Georgiou, C.A.** (2013). Rapid enzymatic method for pectin methyl esters  
909 determination. *J Anal Methods Chem* **2013**, 854763.
- 910 **Levesque-Tremblay, G., Muller, K., Mansfield, S.D., and Haughn, G.W.** (2015a).  
911 HIGHLY METHYL ESTERIFIED SEEDS is a pectin methyl esterase involved in  
912 embryo development. *Plant Physiol* **167**, 725-737.
- 913 **Levesque-Tremblay, G., Pelloux, J., Braybrook, S.A., and Muller, K.** (2015b). Tuning  
914 of pectin methylesterification, consequences for cell wall biomechanics and  
915 development. *Planta* **242**, 791-811.
- 916 **Li, T., Xu, Y., Zhang, L., Ji, Y., Tan, D., Yuan, H., and Wang, A.** (2017). The  
917 Jasmonate-Activated Transcription Factor MdMYC2 Regulates ETHYLENE  
918 RESPONSE FACTOR and Ethylene Biosynthetic Genes to Promote Ethylene  
919 Biosynthesis during Apple Fruit Ripening. *Plant Cell* **29**, 1316-1334.
- 920 **Lionetti, V., Raiola, A., Camardella, L., Giovane, A., Obel, N., Pauly, M., Favaron, F.,**  
921 **Cervone, F., and Bellincampi, D.** (2007). Overexpression of pectin  
922 methylesterase inhibitors in Arabidopsis restricts fungal infection by *Botrytis*  
923 *cinerea*. *Plant Physiol* **143**, 1871-1880.
- 924 **Liu, W., Karemera, N.J.U., Wu, T., Yang, Y., Zhang, X., Xu, X., Wang, Y., and Han,**  
925 **Z.** (2017). The ethylene response factor AtERF4 negatively regulates the iron  
926 deficiency response in Arabidopsis thaliana. *PLoS One* **12**, e0186580.
- 927 **Macquet, A., Ralet, M.C., Kronenberger, J., Marion-Poll, A., and North, H.M.**  
928 (2007). In situ, chemical and macromolecular study of the composition of  
929 Arabidopsis thaliana seed coat mucilage. *Plant Cell Physiol* **48**, 984-999.
- 930 **Maruyama, Y., Yamoto, N., Suzuki, Y., Chiba, Y., Yamazaki, K., Sato, T., and**  
931 **Yamaguchi, J.** (2013). The Arabidopsis transcriptional repressor ERF9  
932 participates in resistance against necrotrophic fungi. *Plant Sci* **213**, 79-87.
- 933 **McGrath, K.C., Dombrecht, B., Manners, J.M., Schenk, P.M., Edgar, C.I., Maclean,**  
934 **D.J., Scheible, W.R., Udvardi, M.K., and Kazan, K.** (2005). Repressor- and  
935 activator-type ethylene response factors functioning in jasmonate signaling and  
936 disease resistance identified via a genome-wide screen of Arabidopsis  
937 transcription factor gene expression. *Plant Physiol* **139**, 949-959.
- 938 **Micheli, F.** (2001). Pectin methylesterases, cell wall enzymes with important roles in  
939 plant physiology. *Trends Plant Sci* **6**, 414-419.
- 940 **Muller, K., Levesque-Tremblay, G., Bartels, S., Weitbrecht, K., Wormit, A., Usadel,**  
941 **B., Haughn, G., and Kermode, A.R.** (2013). Demethylesterification of cell wall  
942 pectins in Arabidopsis plays a role in seed germination. *Plant Physiol* **161**,  
943 305-316.
- 944 **Nakano, T., Suzuki, K., Fujimura, T., and Shinshi, H.** (2006). Genome-wide analysis

- 945 of the ERF gene family in Arabidopsis and rice. *Plant Physiol* **140**, 411-432.
- 946 **Nguyen, H.P., Jeong, H.Y., Jeon, S.H., Kim, D., and Lee, H.P.** (2017). Rice pectin  
947 methylesterase inhibitor28 (OsPMEI28) encodes a functional PMEI and its  
948 overexpression results in a dwarf phenotype through increased pectin  
949 methylesterification levels. *J Plant Physiol* **208**, 17-25.
- 950 **Peaucelle, A., Braybrook, S.A., Le Guillou, L., Bron, E., Kuhlemeier, C., and Hofte,**  
951 **H.** (2011). Pectin-induced changes in cell wall mechanics underlie organ initiation  
952 in Arabidopsis. *Curr Biol* **21**, 1720-1726.
- 953 **Pelletier, S., Orden, J.V., Wolf, S., Vissenberg, K., Delacourt, J., Ndong, Y.A., Pelloux,**  
954 **J., Bischoff, V., Urbrain, A., Mouille, G., Lemonnier, G., Renou, J.P., and**  
955 **Hofte, H.** (2010). A role for pectin de-methylesterification in a developmentally  
956 regulated growth acceleration in darkgrown Arabidopsis hypocotyls. *New*  
957 *Phytologist* **188**, 726-739.
- 958 **Pelloux, J., Rusterucci, C., and Mellerowicz, E.J.** (2007). New insights into pectin  
959 methylesterase structure and function. *Trends Plant Sci* **12**, 267-277.
- 960 **Ranocha, P., Francoz, E., Burlat, V., and Dunand, C.** (2014). Expression of PRX36,  
961 PME16 and SBT1.7 is controlled by complex transcription factor regulatory  
962 networks for proper seed coat mucilage extrusion. *Plant Signal Behav* **9**, e977734.
- 963 **Rautengarten, C., Usadel, B., Neumetzler, L., Hartmann, J., Bussis, D., and Altmann,**  
964 **T.** (2008). A subtilisin-like serine protease essential for mucilage release from  
965 Arabidopsis seed coats. *Plant J* **54**, 466-480.
- 966 **Reca, I.B., Lionetti, V., Camardella, L., D'Avino, R., Giardina, T., Cervone, F., and**  
967 **Bellincampi, D.** (2012). A functional pectin methylesterase inhibitor protein  
968 (SolyPMEI) is expressed during tomato fruit ripening and interacts with PME-1.  
969 *Plant Mol Biol* **79**, 429-442.
- 970 **Riester, L., Koster-Hofmann, S., Doll, J., Berendzen, K.W., and Zentgraf, U.** (2019).  
971 Impact of Alternatively Polyadenylated Isoforms of ETHYLENE RESPONSE  
972 FACTOR4 with Activator and Repressor Function on Senescence in Arabidopsis  
973 thaliana L. *Genes (Basel)* **10**.
- 974 **Rockel, N., Wolf, S., Kost, B., Rausch, T., and Greiner, S.** (2008). Elaborate spatial  
975 patterning of cell- wall PME and PMEI at the pollen tube tip involves PMEI  
976 endocytosis, and reflects the distribution of esterified and de-esterified pectins.  
977 *The Plant J* **53**, 133-143.
- 978 **Saez-Aguayo, S., Ralet, M.C., Berger, A., Botran, L., Ropartz, D., Marion-Poll, A.,**  
979 **and North, H.M.** (2013). PECTIN METHYLESTERASE INHIBITOR6  
980 promotes Arabidopsis mucilage release by limiting methylesterification of  
981 homogalacturonan in seed coat epidermal cells. *Plant Cell* **25**, 308-323.
- 982 **Senechal, F., Mareck, A., Marcelo, P., Lerouge, P., and Pelloux, J.** (2015). Arabidopsis  
983 PME17 Activity can be Controlled by Pectin Methylesterase Inhibitor4. *Plant*  
984 *Signal Behav* **10**, e983351.
- 985 **Shi, D., Ren, A., Tang, X., Qi, G., Xu, Z., Chai, G., Hu, R., Zhou, G., and Kong, Y.**

- 986 (2018). MYB52 Negatively Regulates Pectin Demethylesterification in Seed Coat  
987 Mucilage. *Plant Physiol* **176**, 2737-2749.
- 988 **Sullivan, S., Ralet, M.C., Berger, A., Diatloff, E., Bischoff, V., Gonneau, M.,**  
989 **Marion-Poll, A., and North, H.M.** (2011). CESA5 is required for the synthesis  
990 of cellulose with a role in structuring the adherent mucilage of Arabidopsis seeds.  
991 *Plant Physiol* **156**, 1725-1739.
- 992 **Turbant, A., Fournet, F., Lequart, M., Zabijak, L., Pageau, K., Bouton, S., and Van**  
993 **Wuytswinkel, O.** (2016). PME58 plays a role in pectin distribution during seed  
994 coat mucilage extrusion through homogalacturonan modification. *J Exp Bot* **67**,  
995 2177-2190.
- 996 **Voiniciuc, C., Dean, G.H., Griffiths, J.S., Kirchsteiger, K., Hwang, Y.T., Gillett, A.,**  
997 **Dow, G., Western, T.L., Estelle, M., and Haughn, G.W.** (2013). Flying saucer1  
998 is a transmembrane RING E3 ubiquitin ligase that regulates the degree of pectin  
999 methylesterification in Arabidopsis seed mucilage. *Plant Cell* **25**, 944-959.
- 1000 **Walker, M., Tehseen, M., Doblin, M.S., Pettolino, F.A., Wilson, S.M., Bacic, A., and**  
1001 **Golz, J.F.** (2011). The transcriptional regulator LEUNIG\_HOMOLOG regulates  
1002 mucilage release from the Arabidopsis testa. *Plant Physiol* **156**, 46-60.
- 1003 **Wang, M., Xu, Z., Ahmed, R.I., Wang, Y., Hu, R., Zhou, G., and Kong, Y.** (2019).  
1004 Tubby-like Protein 2 regulates homogalacturonan biosynthesis in Arabidopsis  
1005 seed coat mucilage. *Plant Mol Biol* **99**, 421-436.
- 1006 **Wang, M., Yuan, D., Gao, W., Li, Y., Tan, J., and Zhang, X.** (2013). A comparative  
1007 genome analysis of PME and PME1 families reveals the evolution of pectin  
1008 metabolism in plant cell walls. *PLoS One* **8**, e72082.
- 1009 **Warde-Farley, D., Donaldson, S.L., Comes, O., Zuberi, K., Badrawi, R., Chao, P.,**  
1010 **Franz, M., Grouios, C., Kazi, F., Lopes, C.T., Mailand, A., Mostafavi, S.,**  
1011 **Montejo, J., Shao, Q., Wright, G., Bader, G.D., and Morris, Q.** (2010). The  
1012 GeneMANIA prediction server, biological network integration for gene  
1013 prioritization and predicting gene function. *Nucleic Acids Res* **38**, W214-220.
- 1014 **Western, T.L., Burn, J., Tan, W.L., Skinner, D.J., Martin-McCaffrey, L., Moffatt,**  
1015 **B.A., and Haughn, G.W.** (2001). Isolation and Characterization of Mutants  
1016 Defective in Seed Coat Mucilage Secretory Cell Development in Arabidopsis.  
1017 *Plant Physiol* **127**, 998-1011.
- 1018 **Western, T.L., Skinner, D.J., and Haughn, G.W.** (2000). Differentiation of mucilage  
1019 secretory cells of the Arabidopsis seed coat. *Plant Physiol* **122**, 345-355.
- 1020 **Willats, W.G.T., McCartney, L., and Knox, J.P.** (2001a). In-situ analysis of pectic  
1021 polysaccharides in seed mucilage and at the root surface of Arabidopsis thaliana.  
1022 *Planta* **213**, 37-44.
- 1023 **Willats, W.G.T., Orfila, C., Limberg, G., Buchholt, H.C., van Alebeek, G.-J.W.M.,**  
1024 **Voragen, A.G.J., Marcus, S.E., Christensen, T.M.I.E., Mikkelsen, J.D.,**  
1025 **Murray, B.S., and Knox, J.P.** (2001b). Modulation of the Degree and Pattern of  
1026 Methyl-esterification of Pectic Homogalacturonan in Plant Cell Walls. *Journal of*

- 1027 Biological Chemistry **276**, 19404-19413.
- 1028 **Winter, D., Vinegar, B., Nahal, H., Ammar, R., Wilson, G.V., and Provart, N.J.**
- 1029 (2007). An "Electronic Fluorescent Pictograph" browser for exploring and
- 1030 analyzing large-scale biological data sets. PLoS One **2**, e718.
- 1031 **Wolf, S., Mouille, G., and Pelloux, J.** (2009). Homogalacturonan methyl-esterification
- 1032 and plant development. Mol Plant **2**, 851-860.
- 1033 **Wormit, A., and Usadel, B.** (2018). The multifaced role of pectin methylesterase
- 1034 inhibitors. Int J Mol Sci **19**, 2878.
- 1035 **Yang, Y., Nicolas, M., Zhang, J., Yu, H., Guo, D., Yuan, R., Zhang, T., Yang, J.,**
- 1036 **Cubas, P., and Qin, G.** (2018). The TIE1 transcriptional repressor controls shoot
- 1037 branching by directly repressing BRANCHED1 in Arabidopsis. PLoS Genet **14**,
- 1038 e1007296.
- 1039 **Yang, Z., Tian, L., Latoszek-Green, M., Brown, D., and Wu, K.** (2005). Arabidopsis
- 1040 ERF4 is a transcriptional repressor capable of modulating ethylene and abscisic
- 1041 acid responses. Plant Mol Biol **58**, 585-596.
- 1042 **Yao, W., Wang, L., Wang, J., Ma, F., Yang, Y., Wang, C., Tong, W., Zhang, J., Xu, Y.,**
- 1043 **Wang, X., Zhang, C., and Wang Y.** (2017). VpPUB24, a novel gene from
- 1044 Chinese grapevine, *Vitis pseudoreticulata*, targets VpICE1 to enhance cold
- 1045 tolerance. J Exp Bot **68**, 2933-2949.
- 1046 **Yuan, H., Meng, D., Gu, Z., Li, W., Wang, A., Yang, Q., Zhu, Y., and Li, T.** (2014). A
- 1047 novel gene, MdSSK1, as a component of the SCF complex rather than MdSBP1
- 1048 can mediate the ubiquitination of S-RNase in apple. J Exp Bot **65**, 3121-3131.
- 1049 **Zhang, Z., Zhang, B., Chen, Z., Zhang, D., Zhang, H., Wang, H., Zhang, Y., Cai, D.,**
- 1050 **Liu, J., Xiao, S., Huo, Y., Liu, J., Zhang, L., Wang, M., Liu, X., Xue, Y., Zhao,**
- 1051 **L., Zhou, Y., and Chen, H.** (2018). A PECTIN METHYLESTERASE gene at the
- 1052 maize Gal1 locus confers male function in unilateral cross-incompatibility. Nat
- 1053 Commun **9**, 3678.
- 1054 **Zhao, Y., Cheng, S., Song, Y., Huang, Y., Zhou, S., Liu, X., and Zhou, D.X.** (2015).
- 1055 The Interaction between Rice ERF3 and WOX11 Promotes Crown Root
- 1056 Development by Regulating Gene Expression Involved in Cytokinin Signaling.
- 1057 Plant Cell **27**, 2469-2483.
- 1058 **Zhou, X., Zhang, Z.L., Park, J., Tyler, L., Yusuke, J., Qiu, K., Nam, E.A., Lumba, S.,**
- 1059 **Desveaux, D., McCourt, P., Kamiya, Y., and Sun, T.P.** (2016). The ERF11
- 1060 Transcription Factor Promotes Internode Elongation by Activating Gibberellin
- 1061 Biosynthesis and Signaling. Plant Physiol **171**, 2760-2770.
- 1062

---

1063 **Figure 1. Expression analysis of *ERF4* and the *erf4* mutants present a mucilage**  
1064 **phenotype under vigorous shaking conditions.**

1065 **(A)** Relative expression of *ERF4* in developing siliques at 4, 7, 9, 11 and 13 DPA and  
1066 major Arabidopsis organs with qRT-PCR analysis. Gene expressions were measured  
1067 using the reference gene *ACTIN2*. Values correspond to means  $\pm$  SD of three replicates  
1068 for each sample. The expression level at 4 DPA was set as 1.

1069 **(B)** Co-expression network of *ERF4* with known mucilage genes based on GeneMANIA.  
1070 *GL2*, *Glabra2*; *LUH/MUM1*, Mucilage-modified 1; *MYB52*, MYB domain protein 52;  
1071 *STK*, *SEEDSTICK*; *FLY1*, Flying Saucer 1; *CSLA2*, Cellulose synthase-like A2; *CESA5*,  
1072 Cellulose synthase 5; *SBT1.7*, Subtilisin-like serine protease 1.7; *MUC110*,  
1073 Mucilage-related 10; *PER36*, Peroxidase 36; *PME16*, 13, 14, 15, Pectin methylesterase  
1074 inhibitor 6, 13, 14, 15; *PME58*, Pectin methylesterase 58. Co-expression was indicated  
1075 with purple lines, while proteins share similar domains with yellow green.

1076 **(C)** Gene model of *ERF4* with T-DNA insertion sites. The black line shows coding region  
1077 (CDS), while gray lines represent non-coding upstream and downstream regions.

1078 **(D)** Semi-quantitative RT-PCR was performed on cDNA from siliques of wild-type and  
1079 *erf4* mutants with primers flanking the full-length CDS. *ACTIN2* was amplified as the  
1080 loading control.

1081 **(E)** RR staining of adherent mucilage (AM) for wild-type and *erf4* seeds. Mature dry  
1082 seeds were shaking in distilled water with 0.01% RR at 200 rpm for 1 h before being  
1083 photographed with an optical microscope. Bars = 500  $\mu$ m and 100  $\mu$ m, respectively.

1084 **(F)** Area of AM layers. Values are average area  $\pm$  SD of at least 20 seeds which were  
1085 measured with the optical microscope from the top to the bottom of the red halo (white  
1086 lines in **(E)**).

1087 **(G)** Comparison of total sugar contents in AM layers and whole mucilage of wild-type

---

1088 and *erf4* seeds extracted by shaking at 200 rpm for 1 h in water or EDTA.

1089 \*,  $P < 0.05$ ; n. s., not significant, Student's t-test.

1090 **Figure 2. ERF4 positively regulates HG de-methylesterification by promoting PME**  
1091 **activity.**

1092 (A) Degree of pectin methylesterification (DM%) of wild-type and *erf4* seed mucilage.

1093 Error bars represent SD values of three biological experiments.

1094 (B) to (D) Immunodetection experiments were performed on adherent mucilage released  
1095 from whole seeds. Optical sections of AM were visualized by Confocal microscopy. HGs  
1096 of different methylesterified state were recognized with JIM7 (B), JIM5 (C) and  
1097 CCRC-M38 (D) antibodies, respectively. Calcofluor white was used to label cellulose  
1098 which were shown as blue rays in the sections. Bars = 50  $\mu$ m.

1099 (E) PME activities of total protein extracts from whole seeds of wild-type, *erf4-2* and  
1100 *35S::ERF4* were visualized in gel diffusion analysis.

1101 (F) Relative PME activity was measured according to gel diffusion and was normalized  
1102 to average wild-type activity (=1). Error bars represent SD values of three biological  
1103 experiments.

1104 (G) Expression pattern of *ERF4*, *PMEI13*, *PMEI14*, *PMEI15*, *PMEI16* and *SBT1.7* in  
1105 mutants, including *luh*, *stk*, *myb52*, *erf4-2*, *35S::ERF4* and *erf4-2 myb52*, compared to that  
1106 in wild-type. Gene expressions were measured using the reference gene *ACTIN2*. The  
1107 values represent means of three biological replicates  $\pm$  SD. The expression level for each  
1108 gene in wild-type seeds was set as 1.

1109 \*,  $P < 0.05$ ; \*\*,  $P < 0.01$ ; \*\*\*,  $P < 0.001$ , Student's t-test.

1110 **Figure 3. Identification of *PMEI13*, *PMEI14*, *PMEI15* and *SBT1.7* as downstream**  
1111 **targets of ERF4.**



---

1112 (A) to (D) EMSA analysis showing that ERF4 binds to the GCC-box motif in the  
1113 promoters, intron or exon of *PMEI13* (A), *PMEI14* (B), *PMEI15* (C) and *SBT1.7* (D).  
1114 Relative nucleotide positions of putative ERF binding site are indicated (with the first  
1115 base preceding the ATG start codon being assessed as -1). The DNA probes were  
1116 5'biotin-labeled fragments containing the GCC-box motif. Competitors were the same  
1117 fragments but were non-labeled (5 and 10 fold that of the hot DNA probe). MBP-tagged  
1118 ERF4 fusion protein (MBP-ERF4) was purified, and the MBP tag was used as negative  
1119 control. The sequences show the GCC-box motif which is highlighted in bold.

1120 (E) ChIP-qPCR analysis for chromatin extracts from transgenic plants expressing  
1121 Myc-ERF4 fusion protein and wild-type. Nuclei from developing seeds of Myc-ERF4  
1122 transgenic lines and wild-type were immunoprecipitated by anti-Myc antibody. The  
1123 precipitated chromatin fragments were analyzed by qPCR with primer amplifying these  
1124 GCC-box containing regions (GCC-box1, -box2, -box3, -box4 and -box5) as indicated in  
1125 (A), (B), (C) and (D). Error bars represent means  $\pm$  SD from three independent  
1126 experiments.

1127 (F) Relative LUC activity analysis showing that ERF4 suppresses the expression of  
1128 *PMEI13*, *PMEI14*, *PMEI15* and *SBT1.7*. Dual-LUC transient transcriptional activity  
1129 assays were performed in wild-type Arabidopsis protoplasts. Expression of *ERF4* and the  
1130 *REN* internal control was driven by the CaMV 35S promoter and that of the LUC reporter  
1131 gene was driven by promoters of *PMEI13* or *PMEI15*, first intron of *PMEI14* (*PMEI14i*)  
1132 or exon of *SBT1.7* (*SBT1.7e*) containing GCC-box motif (*proPMEI13*, *proPMEI14i*,  
1133 *proPMEI15* or *proSBT1.7e::LUC*). LUC/REN represents the relative activity of  
1134 promoters. Three independent experiments were performed. The values present the  
1135 means  $\pm$  SD.

1136 \*,  $P < 0.05$ ; \*\*,  $P < 0.01$ ; \*\*\*,  $P < 0.001$ , Student's t-test.

1137 **Figure 4. ERF4 physically interacts with MYB52.**

---

1138 **(A)** Pull-down assay of ERF4 interaction with MYB52. GST tagged MYB52 fusion  
1139 protein (GST-MYB52) or GST alone were incubated with MBP tagged ERF4 fusion  
1140 protein (MBP-ERF4) in GST beads. MBP-ERF4 but not MBP was pulled down by the  
1141 beads containing GST-MYB52. MBP tag alone incubated with GST-MYB52 in GST  
1142 beads was used as negative control.

1143 **(B)** In vivo co-immunoprecipitation assay of ERF4 and MYB52 interaction. Flag tagged  
1144 ERF4 (ERF4-Flag) and Myc tagged MYB52 (MYB52-Myc) were overexpressed in  
1145 Arabidopsis protoplasts. Flag antibody was used for immunoprecipitation analysis, and  
1146 Myc antibody was used for immunoblot analysis. The band detected by Myc antibody in  
1147 the precipitated protein sample indicates the physical interaction between ERF4 and  
1148 MYB52.

1149 **(C)** Interaction of ERF4 and MYB52 in Arabidopsis protoplast. Representative cells were  
1150 shown which were imaged by confocal laser scanning microscopy. The yellow  
1151 fluorescence for YFP was only detected in Arabidopsis protoplasts of ERF4-YC and  
1152 YN-MYB52 interaction. DAPI, nucleus labeled by DAPI in blue fluorescence; CHI,  
1153 chloroplast auto-fluorescence in red signal; DIC, bright field. Bars = 10  $\mu$ m.

1154 **Figure 5. MYB52 interfered ERF4 function in regulating its downstream targets.**

1155 **(A)** to **(D)** EMSA results showing that MYB52 did not bind to probes containing  
1156 GCC-box from *PMEI13* **(A)**, *PMEI14* **(B)**, *PMEI15* **(C)** and *SBTI.7* **(D)** (lane 2), but  
1157 ERF4 did bind to those motifs (lane 3). MYB52 interfered the binding of ERF4 to these  
1158 promoters (lane 4 to 6). The DNA probes were 5'biotin-labeled fragments of the gene  
1159 promoters containing the GCC-box motif. Competitors were the same fragments but were  
1160 non-labeled. MBP-ERF4 and GST-MYB52 fusion proteins were purified.

1161 **(E)** Dual-LUC transient transcriptional activity assays were performed in wild-type  
1162 Arabidopsis protoplast. Effector and reporter plasmids were prepared as mentioned in  
1163 Figure 3F with *35S::MYB52* being additionally constructed. Expression of *REN* was used

---

1164 as internal control. LUC/REN represents the relative activity of promoters from different  
1165 co-transformations. Three independent experiments were performed. The values present  
1166 the means  $\pm$  SD. n. s., not significant; \*\*,  $P < 0.01$ ; \*\*\*,  $P < 0.001$ , Student's t-test.

1167 **Figure 6. ERF4 interfered MYB52 function in activating downstream genes.**

1168 (A) to (C) EMSA results showing that ERF4 did not bind to the MBS motifs in the  
1169 *PMEI14* (A), *PMEI6* (B) and *SBT1.7* (C) promoters (lane 2), but MYB52 did bind to  
1170 them (lane 3). With the increasing of ERF4, the binding of MYB52 to these promoters  
1171 weakened (lane 4 to 6). Relative nucleotide positions of MBS are indicated (with the first  
1172 base preceding the ATG start codon being assessed as -1). The DNA probes were  
1173 5'biotin-labeled fragments containing the MBS motif. Competitors were the same  
1174 fragments but were non-labeled. MBS, MYB binding site.

1175 (D) to (E) LUC/REN showing that the activation of MYB52 to the *PMEI6*, *PMEI14* and  
1176 *SBT1.7* promoters was inhibited by ERF4. The values represent means of three biological  
1177 replicates  $\pm$  SD. n. s., not significant; \*,  $P < 0.05$ ; \*\*,  $P < 0.01$ , Student's t-test.

1178 **Figure 7. ERF4 and MYB52 antagonize each other's function in regulating pectin**  
1179 **de-methylesterification.**

1180 (A) Mucilage phenotypes for wild-type, *erf4-2*, *myb52* and *erf4-2 myb52* double mutants.  
1181 Mature dry seeds were shaking in distilled water with 0.01% RR at 200 rpm for 1 h. Bars  
1182 = 500  $\mu$ m and 100  $\mu$ m, respectively.

1183 (B) Area of adherent mucilage layers. The presented values correspond to average area of  
1184 AM layer  $\pm$  SD of at least 20 seeds. n. s., not significant; \*,  $P < 0.05$ , Student's t-test.

1185 (C) PME activity of total protein extracts from whole seeds of wild-type and *erf4-2*  
1186 *myb52* double mutants in gel diffusion assay. The values were measured according to gel  
1187 diffusion and were normalized to average wild-type activity (=1). Errors represent SD  
1188 values of three biological experiments.

1189 **(D)** A model showing that pectin de-methylesterification is under a fine-tuned regulation  
1190 of the ERF4 and MYB52 transcription complex in the seed coat mucilage. ERF4 and  
1191 MYB52 interact and suppress each other's function in binding down-stream genes  
1192 encoding PME inhibitors and a protease, SBT1.7. ERF4 promotes pectin  
1193 de-methylesterification by directly suppressing *PMEI13*, *PMEI14*, *PMEI15* and *SBT1.7*,  
1194 and indirectly suppressing *PMEI6* expression by preventing MYB52 from binding to its  
1195 promoter. MYB52 negatively regulate pectin de-methylesterification by direct  
1196 transcriptional activating *PMEI6*, *PMEI14* and *SBT1.7*, and by indirect activating  
1197 *PMEI13* and *PMEI15* through inhibiting the binding of ERF4 to their promoters. *ERF4* is  
1198 also negatively regulated by LUH, STK and MYB52 transcription factors. Taken together,  
1199 ERF4 and MYB52 play completely opposite but precise roles in regulation pectin  
1200 de-methylesterification in the seed mucilage. The regulatory network found in this study  
1201 was marked in red, while results from published data in green.

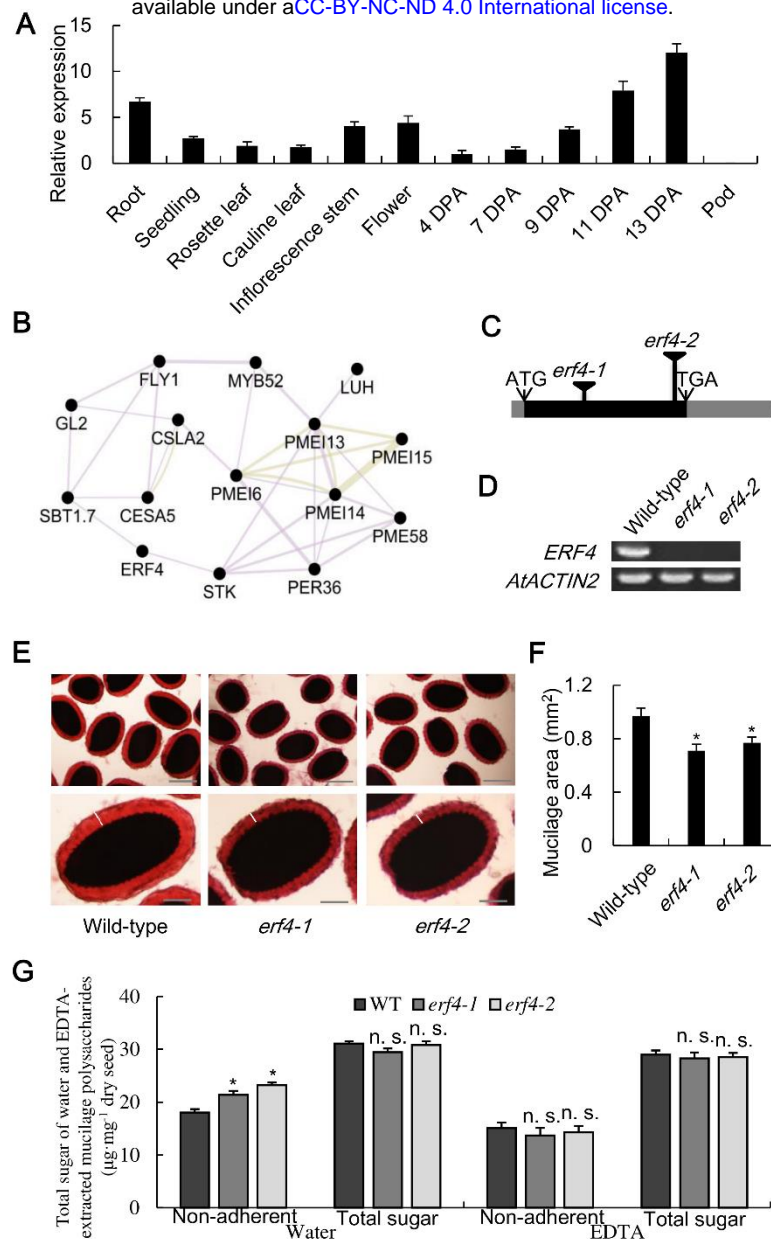

**Figure 1. Expression analysis of *ERF4* and the *erf4* mutants present a mucilage phenotype under vigorous shaking conditions.**

(A) Relative expression of *ERF4* in developing siliques at 4, 7, 9, 11 and 13 DPA and major Arabidopsis organs with qRT-PCR analysis. Gene expressions were measured using the reference gene *ACTIN2*. Values correspond to means  $\pm$  SD of three replicates for each sample. The expression level at 4 DPA was set as 1.

(B) Co-expression network of *ERF4* with known mucilage genes based on GeneMANIA. *GL2*, Glabra2; *LUH/MUM1*, Mucilage-modified 1; *MYB52*, MYB domain protein 52; *STK*, SEEDSTICK; *FLY1*, Flying Saucer 1; *CSLA2*, Cellulose synthase-like A2; *CESA5*, Cellulose synthase 5; *SBT1.7*, Subtilisin-like serine protease 1.7; *MUCI10*, Mucilage-related 10; *PER36*, Peroxidase 36; *PME16*, 13, 14, 15, Pectin methylesterase inhibitor 6, 13, 14, 15; *PME58*, Pectin methylesterase 58. Co-expression was indicated with purple lines, while proteins share similar domains

with yellow green.

(C) Gene model of *ERF4* with T-DNA insertion sites. The black line shows coding region (CDS), while gray lines represent non-coding upstream and downstream regions.

(D) Semi-quantitative RT-PCR was performed on cDNA from siliques of wild-type and *erf4* mutants with primers flanking the full-length CDS. *ACTIN2* was amplified as the loading control.

(E) RR staining of adherent mucilage (AM) for wild-type and *erf4* seeds. Mature dry seeds were shaking in distilled water with 0.01% RR at 200 rpm for 1 h before being photographed with an optical microscope. Bars = 500  $\mu$ m and 100  $\mu$ m, respectively.

(F) Area of AM layers. Values are average area  $\pm$  SD of at least 20 seeds which were measured with the optical microscope from the top to the bottom of the red halo (white lines in (E)).

(G) Comparison of total sugar contents in AM layers and whole mucilage of wild-type and *erf4* seeds extracted by shaking at 200 rpm for 1 h in water or EDTA.

\*,  $P < 0.05$ ; n. s., not significant, Student's t-test.

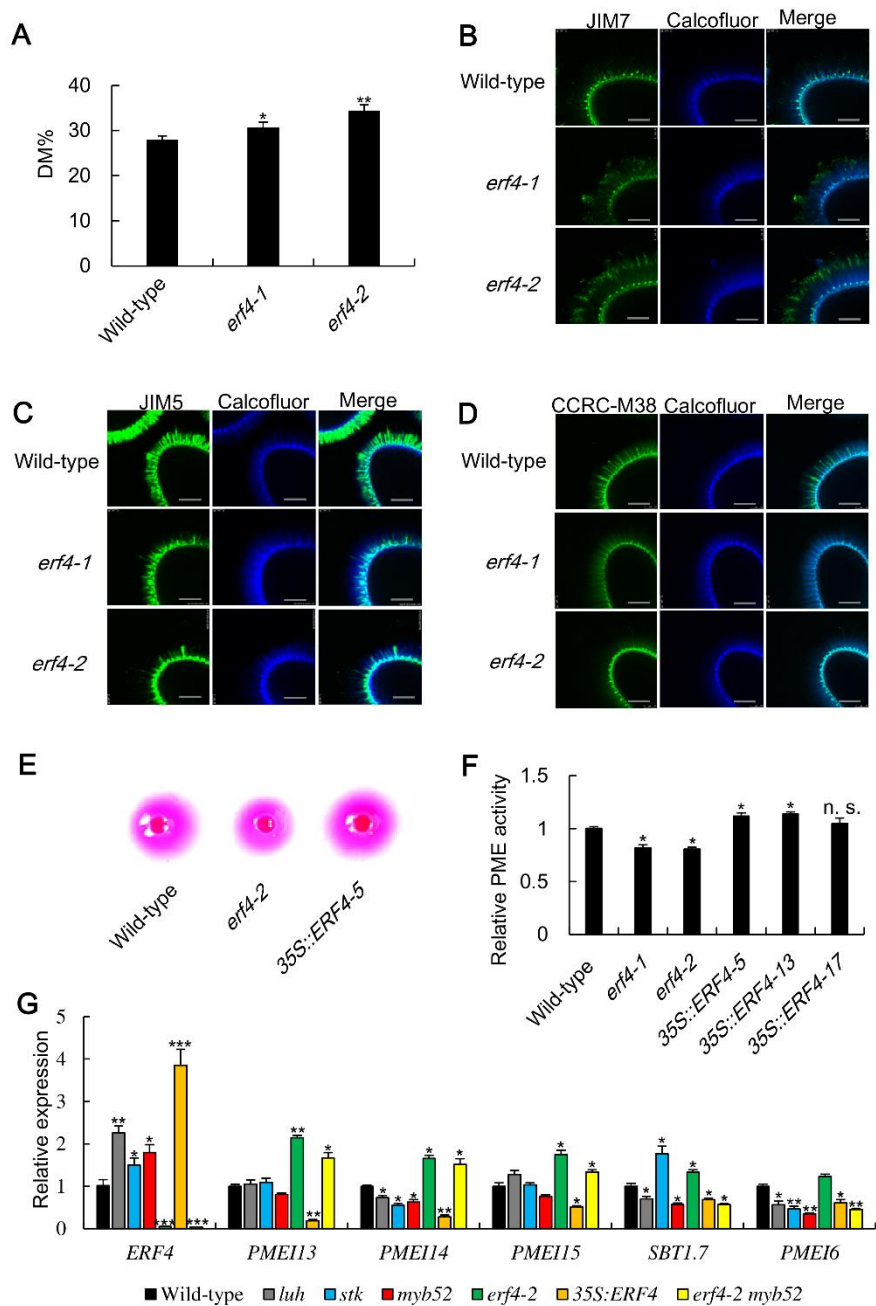

**Figure 2. ERF4 positively regulates HG de-methylesterification by promoting PME activity.**

(A) Degree of pectin methylesterification (DM%) of wild-type and *erf4* seed mucilage. Error bars represent SD values of three biological experiments.

(B) to (D) Immunodetection experiments were performed on adherent mucilage released from whole seeds. Optical sections of AM were visualized by Confocal microscopy. HGs of different methylesterified state were recognized with JIM7 (B), JIM5 (C) and CCRC-M38 (D) antibodies, respectively. Calcofluor white was used to label cellulose which were shown as blue rays in the sections. Bars = 50  $\mu$ m.

(E) PME activities of total protein extracts from whole seeds of wild-type, *erf4-2* and 35S::ERF4 were visualized in gel diffusion analysis.

(F) Relative PME activity was measured according to gel diffusion and was normalized to average wild-type activity (=1). Error bars represent SD values of three biological experiments.

(G) Expression pattern of *ERF4*, *PMEI13*, *PMEI14*, *PMEI15*, *PMEI6* and *SBT1.7* in mutants, including *luh*, *stk*, *myb52*, *erf4-2*, *35S::ERF4* and *erf4-2 myb52*, compared to that in wild-type. Gene expressions were measured using the reference gene *ACTIN2*. The values represent means of three biological replicates  $\pm$  SD. The expression level for each gene in wild-type seeds was set as 1.

\*,  $P < 0.05$ ; \*\*,  $P < 0.01$ ; \*\*\*,  $P < 0.001$ , Student's t-test.



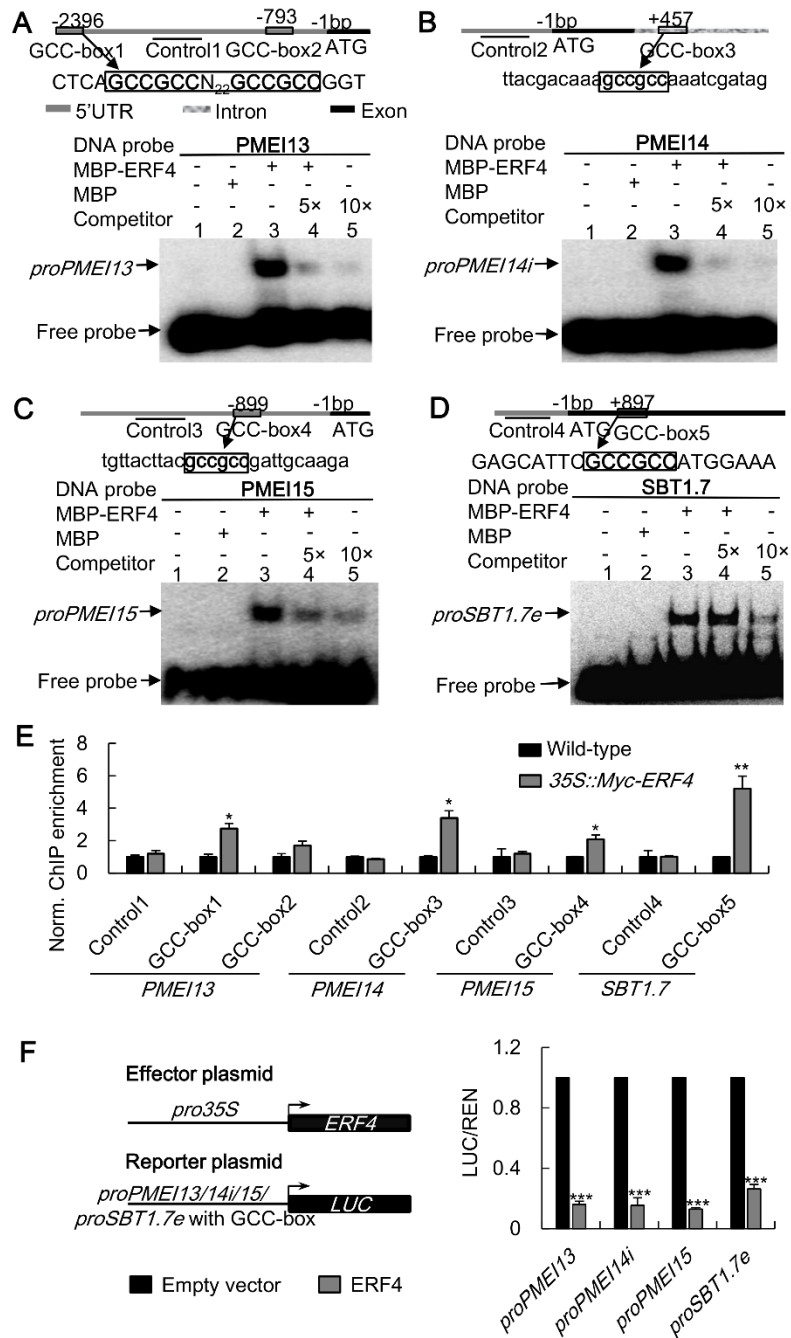

**Figure 3. Identification of *PMEI13*, *PMEI14*, *PMEI15* and *SBT1.7* as downstream targets of ERF4.**

(A) to (D) EMSA analysis showing that ERF4 binds to the GCC-box motif in the promoters, intron or exon of *PMEI13* (A), *PMEI14* (B), *PMEI15* (C) and *SBT1.7* (D). Relative nucleotide positions of putative ERF binding site are indicated (with the first base preceding the ATG start codon being assessed as -1). The DNA probes were 5'biotin-labeled fragments containing the GCC-box motif. Competitors were the same fragments but were non-labeled (5 and 10 fold that of the hot DNA probe). MBP-tagged ERF4 fusion protein (MBP-ERF4) was purified, and the MBP tag was used as negative control. The sequences show the GCC-box motif which is highlighted in bold.

**(E)** ChIP-qPCR analysis for chromatin extracts from transgenic plants expressing Myc-ERF4 fusion protein and wild-type. Nuclei from developing seeds of Myc-ERF4 transgenic lines and wild-type were immunoprecipitated by anti-Myc antibody. The precipitated chromatin fragments were analyzed by qPCR with primer amplifying these GCC-box containing regions (GCC-box1, -box2, -box3, -box4 and -box5) as indicated in **(A)**, **(B)**, **(C)** and **(D)**. Error bars represent means  $\pm$  SD from three independent experiments.

**(F)** Relative LUC activity analysis showing that ERF4 suppresses the expression of *PMEI13*, *PMEI14*, *PMEI15* and *SBT1.7*. Dual-LUC transient transcriptional activity assays were performed in wild-type Arabidopsis protoplasts. Expression of *ERF4* and the *REN* internal control was driven by the CaMV 35S promoter and that of the LUC reporter gene was driven by promoters of *PMEI13* or *PMEI15*, first intron of *PMEI14* (*PMEI14i*) or exon of *SBT1.7* (*SBT1.7e*) containing GCC-box motif (*proPMEI13*, *proPMEI14i*, *proPMEI15* or *proSBT1.7e::LUC*). LUC/REN represents the relative activity of promoters. Three independent experiments were performed. The values present the means  $\pm$  SD.

\*,  $P < 0.05$ ; \*\*,  $P < 0.01$ ; \*\*\*,  $P < 0.001$ , Student's t-test.

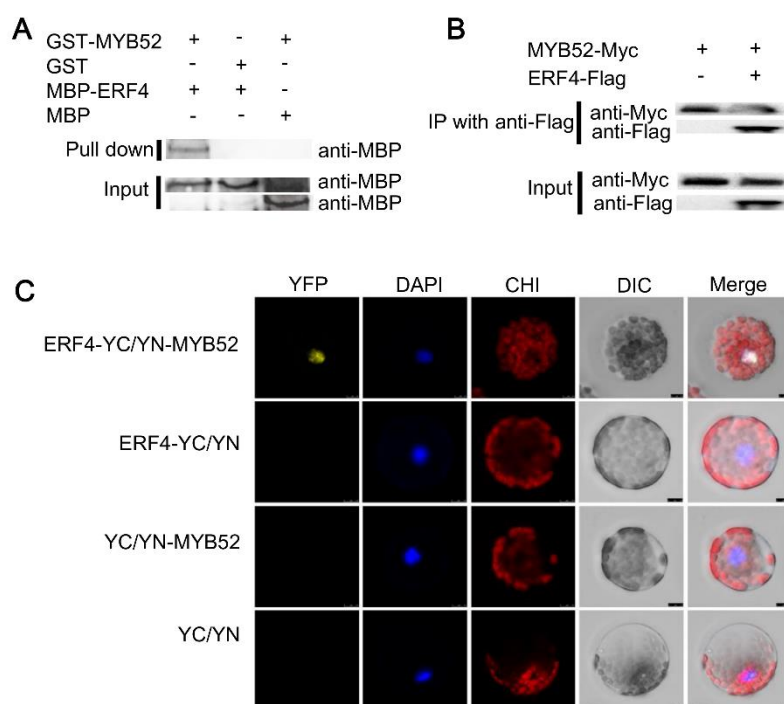

**Figure 4. ERF4 physically interacts with MYB52.**

(A) Pull-down assay of ERF4 interaction with MYB52. GST tagged MYB52 fusion protein (GST-MYB52) or GST alone were incubated with MBP tagged ERF4 fusion protein (MBP-ERF4) in GST beads. MBP-ERF4 but not MBP was pulled down by the beads containing GST-MYB52. MBP tag alone incubated with GST-MYB52 in GST beads was used as negative control.

(B) In vivo co-immunoprecipitation assay of ERF4 and MYB52 interaction. Flag tagged ERF4 (ERF4-Flag) and Myc tagged MYB52 (MYB52-Myc) were overexpressed in Arabidopsis protoplasts. Flag antibody was used for immunoprecipitation analysis, and Myc antibody was used for immunoblot analysis. The band detected by Myc antibody in the precipitated protein sample indicates the physical interaction between ERF4 and MYB52.

(C) Interaction of ERF4 and MYB52 in Arabidopsis protoplast. Representative cells were shown which were imaged by confocal laser scanning microscopy. The yellow fluorescence for YFP was only detected in Arabidopsis protoplasts of ERF4-YC and YN-MYB52 interaction. DAPI, nucleus labeled by DAPI in blue fluorescence; CHI, chloroplast auto-fluorescence in red signal; DIC, bright field. Bars = 10  $\mu$ m.

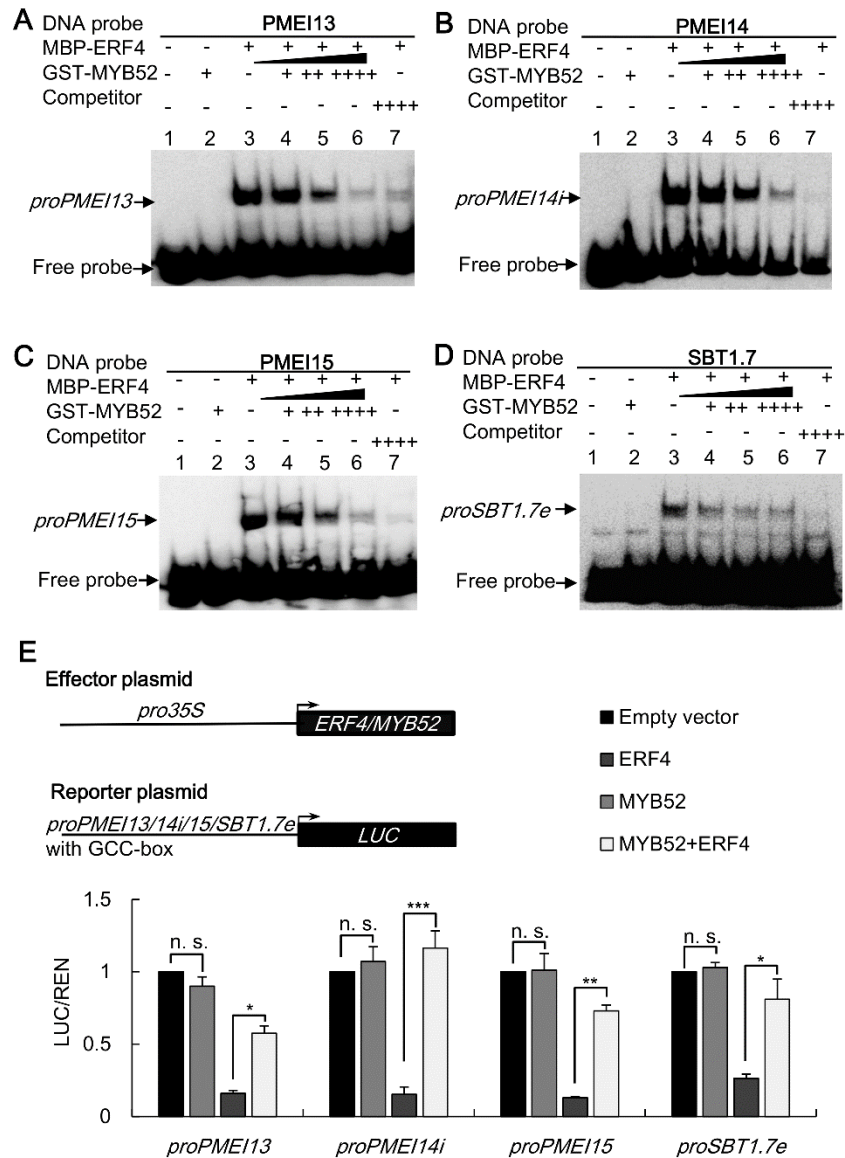

**Figure 5. MYB52 interfered ERF4 function in regulating its downstream targets.** (A) to (D) EMSA results showing that MYB52 did not bind to probes containing GCC-box from *PMEI13* (A), *PMEI14* (B), *PMEI15* (C) and *SBT1.7* (D) (lane 2), but ERF4 did bind to those motifs (lane 3). MYB52 interfered the binding of ERF4 to these promoters (lane 4 to 6). The DNA probes were 5'biotin-labeled fragments of the gene promoters containing the GCC-box motif. Competitors were the same fragments but were non-labeled. MBP-ERF4 and GST-MYB52 fusion proteins were purified. (E) Dual-LUC transient transcriptional activity assays were performed in wild-type Arabidopsis protoplast. Effector and reporter plasmids were prepared as mentioned in Figure 3F with *35S::MYB52* being additionally constructed. Expression of *REN* was used as internal control. LUC/REN represents the relative activity of promoters from different co-transformations. Three independent experiments were performed. The values present the means  $\pm$  SD. n. s., not significant; \*\*,  $P < 0.01$ ; \*\*\*,  $P < 0.001$ , Student's t-test.

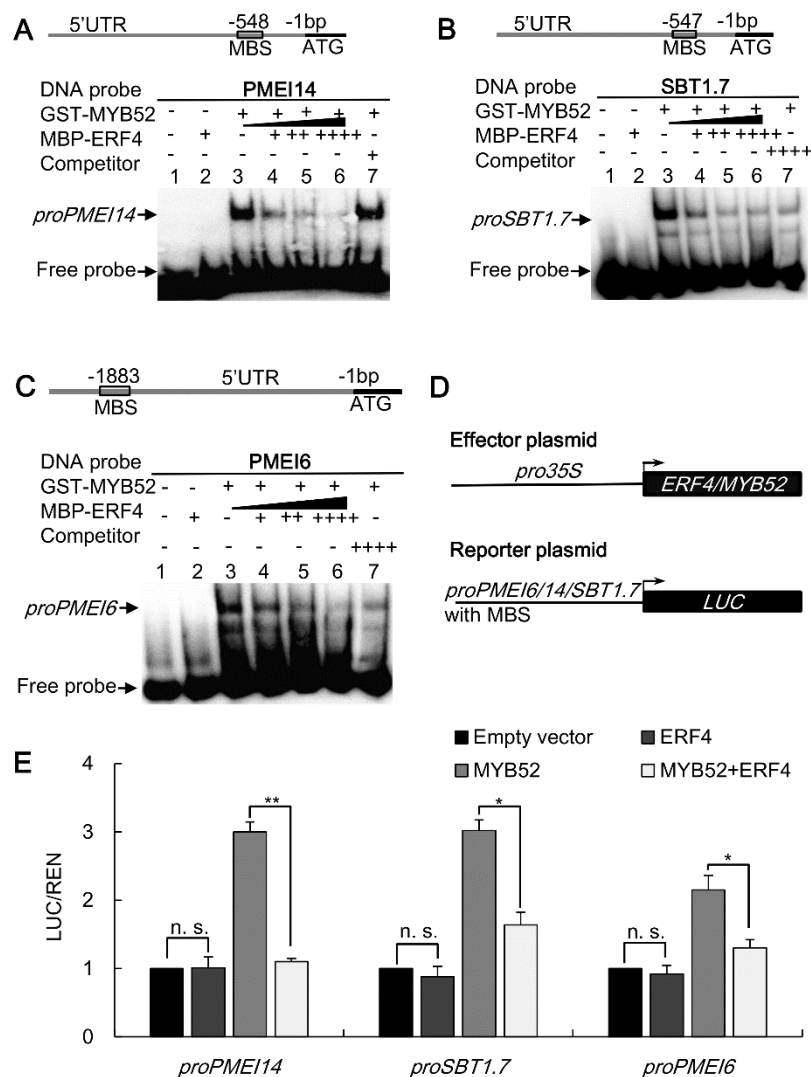

**Figure 6. ERF4 interfered MYB52 function in activating downstream genes.**

(A) to (C) EMSA results showing that ERF4 did not bind to the MBS motifs in the *PMEI14* (A), *PMEI6* (B) and *SBT1.7* (C) promoters (lane 2), but MYB52 did bind to them (lane 3). With the increasing of ERF4, the binding of MYB52 to these promoters weakened (lane 4 to 6). Relative nucleotide positions of MBS are indicated (with the first base preceding the ATG start codon being assessed as -1). The DNA probes were 5'biotin-labeled fragments containing the MBS motif. Competitors were the same fragments but were non-labeled. MBS, MYB binding site.

(D) LUC/REN showing that the activation of MYB52 to the *PMEI6*, *PMEI14* and *SBT1.7* promoters was inhibited by ERF4. The values represent mean of three biological replicates  $\pm$  SD. n. s., not significant; \*,  $P < 0.05$ ; \*\*,  $P < 0.01$ , Student's t-test.

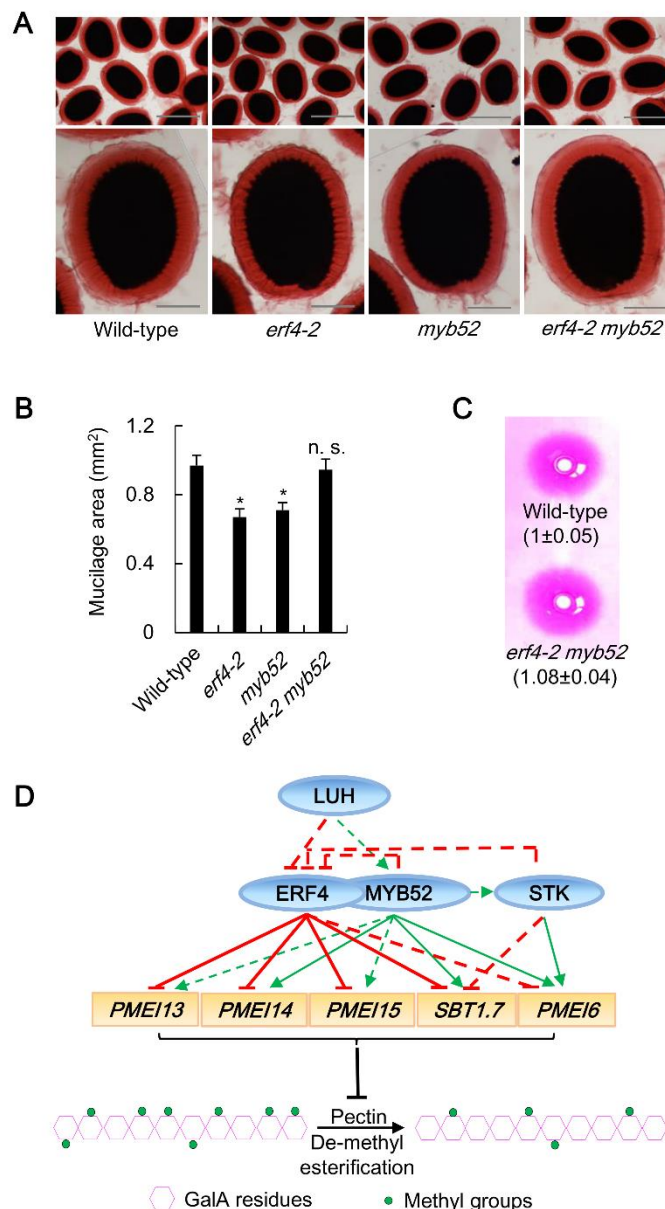

**Figure 7. ERF4 and MYB52 antagonize each other's function in regulating pectin de-methylesterification.**

(A) Mucilage phenotypes for wild-type, *erf4-2*, *myb52* and *erf4-2 myb52* double mutants. Mature dry seeds were shaking in distilled water with 0.01% RR at 200 rpm for 1 h. Bars = 500  $\mu$ m and 100  $\mu$ m, respectively.

(B) Area of adherent mucilage layers. The presented values correspond to average area of AM layer  $\pm$  SD of at least 20 seeds. n. s., not significant; \*,  $P < 0.05$ , Student's t-test.

(C) PME activity of total protein extracts from whole seeds of wild-type and *erf4-2 myb52* double mutants in gel diffusion assay. The values were measured according to gel diffusion and were normalized to average wild-type activity (=1). Errors represent SD values of three biological experiments.

(D) A model showing that pectin de-methylesterification is under a fine-tuned

regulation of the ERF4 and MYB52 transcription complex in the seed coat mucilage. ERF4 and MYB52 interact and suppress each other's function in binding down-stream genes encoding PME inhibitors and a protease, SBT1.7. ERF4 promotes pectin de-methylesterification by directly suppressing *PMEI13*, *PMEI14*, *PMEI15* and *SBT1.7*, and indirectly suppressing *PMEI6* expression by preventing MYB52 from binding to its promoter. MYB52 negatively regulate pectin de-methylesterification by direct transcriptional activating *PMEI6*, *PMEI14* and *SBT1.7*, and by indirect activating *PMEI13* and *PMEI15* through inhibiting the binding of ERF4 to their promoters. *ERF4* is also negatively regulated by LUH, STK and MYB52 transcription factors. Taken together, ERF4 and MYB52 play completely opposite but precise roles in regulation pectin de-methylesterification in the seed mucilage. The regulatory network found in this study was marked in red, while results from published data in green.

## Parsed Citations

**Arsovski, A.A., Haughn, G.W., and Western, T.L. (2010).** Seed coat mucilage cells of *Arabidopsis thaliana* as a model for plant cell wall research. *Plant Signal Behav* 5, 796-801.

Pubmed: [Author and Title](#)

Google Scholar: [Author Only Title Only Author and Title](#)

**Bethke, G., Grundman, R.E., Sreekanta, S., Truman, W., Katagiri, F., and Glazebrook, J. (2014).** *Arabidopsis* PECTIN METHYLESTERASEs contribute to immunity against *Pseudomonas syringae*. *Plant Physiol* 164, 1093-1107.

Pubmed: [Author and Title](#)

Google Scholar: [Author Only Title Only Author and Title](#)

**Bradford, M.M. (1976).** A rapid and sensitive method for the quantitation of microgram quantities of protein utilizing the principle of protein-dye binding. *Analytical Biochem* 72, 248-254.

Pubmed: [Author and Title](#)

Google Scholar: [Author Only Title Only Author and Title](#)

**de Vooght, K.M., van Wijk, R., and van Solinge, W.W. (2008).** GATA-1 binding site in exon1 direct erythroid-specific transcription of PPOX. *Gene* 409, 83-91.

Pubmed: [Author and Title](#)

Google Scholar: [Author Only Title Only Author and Title](#)

**Dekkers, B.J., Willems, L., Bassel, G.W., van Bolderen-Veldkamp, R.P., Ligterink, W., Hilhorst, H.W., and Bentsink, L. (2012).** Identification of reference genes for RT-qPCR expression analysis in *Arabidopsis* and tomato seeds. *Plant Cell Physiol* 53, 28-37.

Pubmed: [Author and Title](#)

Google Scholar: [Author Only Title Only Author and Title](#)

**Derbyshire, P., McCann, M.C., and Roberts, K. (2007).** Restricted cell elongation in *Arabidopsis* hypocotyls is associated with a reduced average pectin esterification level. *BMC Plant Biol* 7, 31.

Pubmed: [Author and Title](#)

Google Scholar: [Author Only Title Only Author and Title](#)

**Ehlers, K., Bhide, A.S., Tekleyohans, D.G., Wittkop, B., Snowdon, R.J., and Becker, A. (2016).** The MADS Box Genes *ABS*, *SHP1*, and *SHP2* Are Essential for the Coordination of Cell Divisions in Ovule and Seed Coat Development and for Endosperm Formation in *Arabidopsis thaliana*. *PLoS One* 11, e0165075.

Pubmed: [Author and Title](#)

Google Scholar: [Author Only Title Only Author and Title](#)

**Ezquer, I., Mizzotti, C., Nguema-Ona, E., Gotte, M., Beuzamy, L., Viana, V.E., Dubrulle, N., Costa de Oliveira, A., Caporali, E., Koroney, A.S., Boudaoud, A., Driouich, A., and Colombo, L. (2016).** The Developmental Regulator *SEEDSTICK* Controls Structural and Mechanical Properties of the *Arabidopsis* Seed Coat. *Plant Cell* 28, 2478-2492.

Pubmed: [Author and Title](#)

Google Scholar: [Author Only Title Only Author and Title](#)

**Fan, Z.Q., Kuang, J.F., Fu, C.C., Shan, W., Han, Y.C., Xiao, Y.Y., Ye, Y.J., Lu, W.J., Lakshmanan, P., Duan, X.W., and Chen, J.Y. (2016).** The Banana Transcriptional Repressor *MaDEAR1* Negatively Regulates Cell Wall-Modifying Genes Involved in Fruit Ripening. *Front Plant Sci* 7, 1021.

Pubmed: [Author and Title](#)

Google Scholar: [Author Only Title Only Author and Title](#)

**Francoz, E., Ranocha, P., Burlat, V., and Dunand, C. (2015).** *Arabidopsis* seed mucilage secretory cells, regulation and dynamics. *Trends Plant Sci* 20, 515-524.

Pubmed: [Author and Title](#)

Google Scholar: [Author Only Title Only Author and Title](#)

**Fujimoto, S.Y., Ohta, M., Usui, A., Shinshi, H., and Ohme-Takagi, M. (2000).** *Arabidopsis* ethylene-responsive element binding factors act as transcriptional activators or repressors of GCC box-mediated gene expression. *Plant Cell* 12, 393-404.

Pubmed: [Author and Title](#)

Google Scholar: [Author Only Title Only Author and Title](#)

**Gendrel, A.V., Lippman, Z., Martienssen, R., and Colot, V. (2005)** Profiling histone modification patterns in plants using genomic tiling microarray. *Nat method* 2, 213-218.

Pubmed: [Author and Title](#)

Google Scholar: [Author Only Title Only Author and Title](#)

**Golz, J.F., Allen, P.J., Li, S.F., Parish, R.W., Jayawardana, N.U., Bacic, A., and Doblin, M.S. (2018).** Layers of regulation-Insights into the role of transcription factors controlling mucilage production in the *Arabidopsis* seed coat. *Plant Sci* 272, 179-192.

Pubmed: [Author and Title](#)

Google Scholar: [Author Only Title Only Author and Title](#)

**Griffiths, J.S., Crepeau, M.J., Ralet, M.C., Seifert, G.J., and North, H.M. (2016).** Dissecting Seed Mucilage Adherence Mediated by *FEI2* and *SOS5*. *Front Plant Sci* 7, 1073.

Pubmed: [Author and Title](#)

Google Scholar: [Author Only Title Only Author and Title](#)



Guenin, S., Mareck, A., Rayon, C., Lamour, R., Assoumou Ndong, Y., Domon, J.M., Senechal, F., Fournet, F., Jamet, E., Canut, H., Percoco, G., Mouille, G., Rolland, A., Rusterucci, C., Guerineau, F., Wuytswinkel, O.V., Gillet, F., Driouich, A., Lerouge, P., Gutierrez, L., and Pelloux, J. (2011). Identification of pectin methyl esterase 3 as a basic pectin methyl esterase isoform involved in adventitious rooting in *Arabidopsis thaliana*. *New Phytol* 192, 114-126.

Pubmed: [Author and Title](#)

Google Scholar: [Author Only Title Only Author and Title](#)

Haughn, G.W., and Western, T.L. (2012). *Arabidopsis* Seed Coat Mucilage is a Specialized Cell Wall that Can be Used as a Model for Genetic Analysis of Plant Cell Wall Structure and Function. *Front Plant Sci* 3, 64.

Pubmed: [Author and Title](#)

Google Scholar: [Author Only Title Only Author and Title](#)

Hu, R., Li, J., Wang, X., Zhao, X., Yang, X., Tang, Q., He, G., Zhou, G., and Kong, Y. (2016). Xylan synthesized by Irregular Xylem 14 (IRX14) maintains the structure of seed coat mucilage in *Arabidopsis*. *J Exp Bot* 67, 1243-1257.

Pubmed: [Author and Title](#)

Google Scholar: [Author Only Title Only Author and Title](#)

Huang, J., DeBowles, D., Esfandiari, E., Dean, G., Carpita, N.C., and Haughn, G.W. (2011). The *Arabidopsis* transcription factor LUH/MUM1 is required for extrusion of seed coat mucilage. *Plant Physiol* 156, 491-502.

Pubmed: [Author and Title](#)

Google Scholar: [Author Only Title Only Author and Title](#)

Jiang, L.X., Yang, S.L., Xie, L.F., Puah, C.S., Zhang, X.Q., Yang, W.C., Sundaresan, V., and Ye, D. (2005). VANGUARD1 encodes a pectin methyl esterase that enhance pollen tube growth in the *Arabidopsis* style and transmitting tract. *Plant Cell* 17, 584-596.

Pubmed: [Author and Title](#)

Google Scholar: [Author Only Title Only Author and Title](#)

Jofuku, K.D., den Boer, B.G.W., Montagu, M.V., and Okamoto, J.K. (1994). Control of *Arabidopsis* flower and seed development by the homeotic gene APETALA2. *Plant Cell* 6, 1211-1225.

Pubmed: [Author and Title](#)

Google Scholar: [Author Only Title Only Author and Title](#)

Klavons, J.A., and Bennett, R.D. (1986). Determination of methanol using alcohol oxidase and its application to methyl ester content of pectins. *Journal of Agricultural and Food Chemistry* 34, 597-599.

Pubmed: [Author and Title](#)

Google Scholar: [Author Only Title Only Author and Title](#)

Klepikova, A.V., Kasianov, A.S., Gerasimov, E.S., Logacheva, M.D., and Penin, A.A. (2016). A high resolution map of the *Arabidopsis thaliana* developmental transcriptome based on RNA-seq profiling. *Plant J* 88, 1058-1070.

Pubmed: [Author and Title](#)

Google Scholar: [Author Only Title Only Author and Title](#)

Koyama, T., Nii, H., Mitsuda, N., Ohta, M., Kitajima, S., Ohme-Takagi, M., and Sato, F. (2013). A regulatory cascade involving class II ETHYLENE RESPONSE FACTOR transcriptional repressors operates in the progression of leaf senescence. *Plant Physiol* 162, 991-1005.

Pubmed: [Author and Title](#)

Google Scholar: [Author Only Title Only Author and Title](#)

Le, B.H., Cheng, C., Bui, A.Q., Wagmaister, J.A., Henry, K.F., Pelletier, J., Kwong, L., Belmonte, M., Kirkbride, R., Horvath, S., Drews, G.N., Fischer, R.L., Okamoto, J.K., Harada, J.J., and Goldberg, R.B. (2010). Global analysis of gene activity during *Arabidopsis* seed development and identification of seed-specific transcription factors. *Proc Natl Acad Sci* 107, 8063-8070.

Pubmed: [Author and Title](#)

Google Scholar: [Author Only Title Only Author and Title](#)

Lekawska-Andrinopoulou, L., Vasiliou, E.G., Georgakopoulos, D.G., Yialouris, C.P., and Georgiou, C.A. (2013). Rapid enzymatic method for pectin methyl esters determination. *J Anal Methods Chem* 2013, 854763.

Pubmed: [Author and Title](#)

Google Scholar: [Author Only Title Only Author and Title](#)

Levesque-Tremblay, G., Muller, K., Mansfield, S.D., and Haughn, G.W. (2015a). HIGHLY METHYL ESTERIFIED SEEDS is a pectin methyl esterase involved in embryo development. *Plant Physiol* 167, 725-737.

Pubmed: [Author and Title](#)

Google Scholar: [Author Only Title Only Author and Title](#)

Levesque-Tremblay, G., Pelloux, J., Braybrook, S.A., and Muller, K. (2015b). Tuning of pectin methylesterification, consequences for cell wall biomechanics and development. *Planta* 242, 791-811.

Pubmed: [Author and Title](#)

Google Scholar: [Author Only Title Only Author and Title](#)

Li, T., Xu, Y., Zhang, L., Ji, Y., Tan, D., Yuan, H., and Wang, A. (2017). The Jasmonate-Activated Transcription Factor MdMYC2 Regulates ETHYLENE RESPONSE FACTOR and Ethylene Biosynthetic Genes to Promote Ethylene Biosynthesis during Apple Fruit Ripening. *Plant Cell* 29, 1316-1334.

Pubmed: [Author and Title](#)

Google Scholar: [Author Only](#) [Title Only](#) [Author and Title](#)

Lionetti, V., Raiola, A., Camardella, L., Giovane, A., Obel, N., Pauly, M., Favaron, F., Cervone, F., and Bellincampi, D. (2007). Overexpression of pectin methylesterase inhibitors in *Arabidopsis* restricts fungal infection by *Botrytis cinerea*. *Plant Physiol* 143, 1871-1880.

Pubmed: [Author and Title](#)

Google Scholar: [Author Only](#) [Title Only](#) [Author and Title](#)

Liu, W., Karemera, N.J.U., Wu, T., Yang, Y., Zhang, X., Xu, X., Wang, Y., and Han, Z. (2017). The ethylene response factor *AtERF4* negatively regulates the iron deficiency response in *Arabidopsis thaliana*. *PLoS One* 12, e0186580.

Pubmed: [Author and Title](#)

Google Scholar: [Author Only](#) [Title Only](#) [Author and Title](#)

Macquet, A., Ralet, M.C., Kronenberger, J., Marion-Poll, A., and North, H.M. (2007). In situ, chemical and macromolecular study of the composition of *Arabidopsis thaliana* seed coat mucilage. *Plant Cell Physiol* 48, 984-999.

Pubmed: [Author and Title](#)

Google Scholar: [Author Only](#) [Title Only](#) [Author and Title](#)

Maruyama, Y., Yamoto, N., Suzuki, Y., Chiba, Y., Yamazaki, K., Sato, T., and Yamaguchi, J. (2013). The *Arabidopsis* transcriptional repressor *ERF9* participates in resistance against necrotrophic fungi. *Plant Sci* 213, 79-87.

Pubmed: [Author and Title](#)

Google Scholar: [Author Only](#) [Title Only](#) [Author and Title](#)

McGrath, K.C., Dombrecht, B., Manners, J.M., Schenk, P.M., Edgar, C.I., Maclean, D.J., Scheible, W.R., Udvardi, M.K., and Kazan, K. (2005). Repressor- and activator-type ethylene response factors functioning in jasmonate signaling and disease resistance identified via a genome-wide screen of *Arabidopsis* transcription factor gene expression. *Plant Physiol* 139, 949-959.

Pubmed: [Author and Title](#)

Google Scholar: [Author Only](#) [Title Only](#) [Author and Title](#)

Micheli, F. (2001). Pectin methylesterases, cell wall enzymes with important roles in plant physiology. *Trends Plant Sci* 6, 414-419.

Pubmed: [Author and Title](#)

Google Scholar: [Author Only](#) [Title Only](#) [Author and Title](#)

Muller, K., Levesque-Tremblay, G., Bartels, S., Weitbrecht, K., Wormit, A., Usadel, B., Haughn, G., and Kermode, A.R. (2013). Demethylesterification of cell wall pectins in *Arabidopsis* plays a role in seed germination. *Plant Physiol* 161, 305-316.

Pubmed: [Author and Title](#)

Google Scholar: [Author Only](#) [Title Only](#) [Author and Title](#)

Nakano, T., Suzuki, K., Fujimura, T., and Shinshi, H. (2006). Genome-wide analysis of the ERF gene family in *Arabidopsis* and rice. *Plant Physiol* 140, 411-432.

Pubmed: [Author and Title](#)

Google Scholar: [Author Only](#) [Title Only](#) [Author and Title](#)

Nguyen, H.P., Jeong, H.Y., Jeon, S.H., Kim, D., and Lee, H.P. (2017). Rice pectin methylesterase inhibitor28 (*OsPMEI28*) encodes a functional PME1 and its overexpression results in a dwarf phenotypethrough increased pectin methylesterification levels. *J Plant Physiol* 208, 17-25.

Pubmed: [Author and Title](#)

Google Scholar: [Author Only](#) [Title Only](#) [Author and Title](#)

Peaucelle, A., Braybrook, S.A., Le Guillou, L., Bron, E., Kuhlemeier, C., and Hofte, H. (2011). Pectin-induced changes in cell wall mechanics underlie organ initiation in *Arabidopsis*. *Curr Biol* 21, 1720-1726.

Pubmed: [Author and Title](#)

Google Scholar: [Author Only](#) [Title Only](#) [Author and Title](#)

Pelletier, S., Orden, J.V., Wolf, S., Vissenberg, K., Delacourt, J., Ndong, Y.A., Pelloux, J., Bischoff, V., Urbrain, A., Mouille, G., Lemonnier, G., Renou, J.P., and Hofte, H. (2010). A role for pectin de-methylesterification in a developmentally regulated growth acceleration in darkgrown *Arabidopsis* hypocotyls. *New Phytologist* 188, 726-739.

Pubmed: [Author and Title](#)

Google Scholar: [Author Only](#) [Title Only](#) [Author and Title](#)

Pelloux, J., Rusterucci, C., and Mellerowicz, E.J. (2007). New insights into pectin methylesterase structure and function. *Trends Plant Sci* 12, 267-277.

Pubmed: [Author and Title](#)

Google Scholar: [Author Only](#) [Title Only](#) [Author and Title](#)

Ranocha, P., Francoz, E., Burlat, V., and Dunand, C. (2014). Expression of *PRX36*, *PMEI6* and *SBT1.7* is controlled by complex transcription factor regulatory networks for proper seed coat mucilage extrusion. *Plant Signal Behav* 9, e977734.

Pubmed: [Author and Title](#)

Google Scholar: [Author Only](#) [Title Only](#) [Author and Title](#)

Rautengarten, C., Usadel, B., Neumetzler, L., Hartmann, J., Bussis, D., and Altmann, T. (2008). A subtilisin-like serine protease essential for mucilage release from *Arabidopsis* seed coats. *Plant J* 54, 466-480.

Pubmed: [Author and Title](#)

Google Scholar: [Author Only](#) [Title Only](#) [Author and Title](#)

**Reca, I.B., Lionetti, V., Camardella, L., D'Avino, R., Giardina, T., Cervone, F., and Bellincampi, D. (2012). A functional pectin methylesterase inhibitor protein (SolyPMEI) is expressed during tomato fruit ripening and interacts with PME-1. Plant Mol Biol 79, 429-442.**

Pubmed: [Author and Title](#)

Google Scholar: [Author Only Title Only Author and Title](#)

**Riester, L., Koster-Hofmann, S., Doll, J., Berendzen, K.W., and Zentgraf, U. (2019). Impact of Alternatively Polyadenylated Isoforms of ETHYLENE RESPONSE FACTOR4 with Activator and Repressor Function on Senescence in Arabidopsis thaliana L. Genes (Basel) 10.**

Pubmed: [Author and Title](#)

Google Scholar: [Author Only Title Only Author and Title](#)

**Rockel, N., Wolf, S., Kost, B., Rausch, T., and Greiner, S. (2008). Elaborate spatial patterning of cell-wall PME and PMEI at the pollen tube tip involves PMEI endocytosis, and reflects the distribution of esterified and de-esterified pectins. The Plant J 53, 133-143.**

Pubmed: [Author and Title](#)

Google Scholar: [Author Only Title Only Author and Title](#)

**Saez-Aguayo, S., Ralet, M.C., Berger, A., Botran, L., Ropartz, D., Marion-Poll, A., and North, H.M. (2013). PECTIN METHYLESTERASE INHIBITOR6 promotes Arabidopsis mucilage release by limiting methylesterification of homogalacturonan in seed coat epidermal cells. Plant Cell 25, 308-323.**

Pubmed: [Author and Title](#)

Google Scholar: [Author Only Title Only Author and Title](#)

**Senechal, F., Mareck, A., Marcelo, P., Lerouge, P., and Pelloux, J. (2015). Arabidopsis PME17 Activity can be Controlled by Pectin Methylesterase Inhibitor4. Plant Signal Behav 10, e983351.**

Pubmed: [Author and Title](#)

Google Scholar: [Author Only Title Only Author and Title](#)

**Shi, D., Ren, A., Tang, X., Qi, G., Xu, Z., Chai, G., Hu, R., Zhou, G., and Kong, Y. (2018). MYB52 Negatively Regulates Pectin Demethylesterification in Seed Coat Mucilage. Plant Physiol 176, 2737-2749.**

Pubmed: [Author and Title](#)

Google Scholar: [Author Only Title Only Author and Title](#)

**Sullivan, S., Ralet, M.C., Berger, A., Diatloff, E., Bischoff, V., Gonneau, M., Marion-Poll, A., and North, H.M. (2011). CESA5 is required for the synthesis of cellulose with a role in structuring the adherent mucilage of Arabidopsis seeds. Plant Physiol 156, 1725-1739.**

Pubmed: [Author and Title](#)

Google Scholar: [Author Only Title Only Author and Title](#)

**Turbant, A., Fournet, F., Lequart, M., Zabijak, L., Pageau, K., Bouton, S., and Van Wuytswinkel, O. (2016). PME58 plays a role in pectin distribution during seed coat mucilage extrusion through homogalacturonan modification. J Exp Bot 67, 2177-2190.**

Pubmed: [Author and Title](#)

Google Scholar: [Author Only Title Only Author and Title](#)

**Voiniciuc, C., Dean, G.H., Griffiths, J.S., Kirchsteiger, K., Hwang, Y.T., Gillett, A., Dow, G., Western, T.L., Estelle, M., and Haughn, G.W. (2013). Flying saucer1 is a transmembrane RING E3 ubiquitin ligase that regulates the degree of pectin methylesterification in Arabidopsis seed mucilage. Plant Cell 25, 944-959.**

Pubmed: [Author and Title](#)

Google Scholar: [Author Only Title Only Author and Title](#)

**Walker, M., Tehseen, M., Doblin, M.S., Pettolino, F.A., Wilson, S.M., Bacic, A., and Golz, J.F. (2011). The transcriptional regulator LEUNIG\_HOMOLOG regulates mucilage release from the Arabidopsis testa. Plant Physiol 156, 46-60.**

Pubmed: [Author and Title](#)

Google Scholar: [Author Only Title Only Author and Title](#)

**Wang, M., Xu, Z., Ahmed, R.I., Wang, Y., Hu, R., Zhou, G., and Kong, Y. (2019). Tubby-like Protein 2 regulates homogalacturonan biosynthesis in Arabidopsis seed coat mucilage. Plant Mol Biol 99, 421-436.**

Pubmed: [Author and Title](#)

Google Scholar: [Author Only Title Only Author and Title](#)

**Wang, M., Yuan, D., Gao, W., Li, Y., Tan, J., and Zhang, X. (2013). A comparative genome analysis of PME and PMEI families reveals the evolution of pectin metabolism in plant cell walls. PLoS One 8, e72082.**

Pubmed: [Author and Title](#)

Google Scholar: [Author Only Title Only Author and Title](#)

**Warde-Farley, D., Donaldson, S.L., Comes, O., Zuberi, K., Badrawi, R., Chao, P., Franz, M., Grouios, C., Kazi, F., Lopes, C.T., Mailand, A., Mostafavi, S., Montojo, J., Shao, Q., Wright, G., Bader, G.D., and Morris, Q. (2010). The GeneMANIA prediction server, biological network integration for gene prioritization and predicting gene function. Nucleic Acids Res 38, W214-220.**

Pubmed: [Author and Title](#)

Google Scholar: [Author Only Title Only Author and Title](#)

**Western, T.L., Burn, J., Tan, W.L., Skinner, D.J., Martin-McCaffrey, L., Moffatt, B.A., and Haughn, G.W. (2001). Isolation and Characterization of Mutants Defective in Seed Coat Mucilage Secretory Cell Development in Arabidopsis. Plant Physiol 127, 998-1011.**

Pubmed: [Author and Title](#)

Google Scholar: [Author Only Title Only Author and Title](#)

**Western, T.L., Skinner, D.J., and Haughn, G.W. (2000). Differentiation of mucilage secretory cells of the Arabidopsis seed coat. Plant Physiol 122, 345-355.**

Pubmed: [Author and Title](#)

Google Scholar: [Author Only Title Only Author and Title](#)

**Willats, W.G.T., McCartney, L., and Knox, J.P. (2001a). In-situ analysis of pectic polysaccharides in seed mucilage and at the root surface of Arabidopsis thaliana. Planta 213, 37-44.**

Pubmed: [Author and Title](#)

Google Scholar: [Author Only Title Only Author and Title](#)

**Willats, W.G.T., Orfila, C., Limberg, G., Buchholt, H.C., van Alebeek, G.-J.W.M., Voragen, A.G.J., Marcus, S.E., Christensen, T.M.I.E., Mikkelsen, J.D., Murray, B.S., and Knox, J.P. (2001b). Modulation of the Degree and Pattern of Methyl-esterification of Pectic Homogalacturonan in Plant Cell Walls. Journal of Biological Chemistry 276, 19404-19413.**

Pubmed: [Author and Title](#)

Google Scholar: [Author Only Title Only Author and Title](#)

**Winter, D., Vinegar, B., Nahal, H., Ammar, R., Wilson, G.V., and Provart, N.J. (2007). An "Electronic Fluorescent Pictograph" browser for exploring and analyzing large-scale biological data sets. PLoS One 2, e718.**

Pubmed: [Author and Title](#)

Google Scholar: [Author Only Title Only Author and Title](#)

**Wolf, S., Mouille, G., and Pelloux, J. (2009). Homogalacturonan methyl-esterification and plant development. Mol Plant 2, 851-860.**

Pubmed: [Author and Title](#)

Google Scholar: [Author Only Title Only Author and Title](#)

**Wormit, A., and Usadel, B. (2018). The multifaced role of pectin methylesterase inhibitors. Int J Mol Sci 19, 2878.**

Pubmed: [Author and Title](#)

Google Scholar: [Author Only Title Only Author and Title](#)

**Yang, Y., Nicolas, M., Zhang, J., Yu, H., Guo, D., Yuan, R., Zhang, T., Yang, J., Cubas, P., and Qin, G. (2018). The TIE1 transcriptional repressor controls shoot branching by directly repressing BRANCHED1 in Arabidopsis. PLoS Genet 14, e1007296.**

Pubmed: [Author and Title](#)

Google Scholar: [Author Only Title Only Author and Title](#)

**Yang, Z., Tian, L., Latoszek-Green, M., Brown, D., and Wu, K. (2005). Arabidopsis ERF4 is a transcriptional repressor capable of modulating ethylene and abscisic acid responses. Plant Mol Biol 58, 585-596.**

Pubmed: [Author and Title](#)

Google Scholar: [Author Only Title Only Author and Title](#)

**Yao, W., Wang, L., Wang, J., Ma, F., Yang, Y., Wang, C., Tong, W., Zhang, J., Xu, Y., Wang, X., Zhang, C., and Wang Y. (2017). VpPUB24, a novel gene from Chinese grapevine, Vitis pseudoreticulata, targets VpICE1 to enhance cold tolerance. J Exp Bot 68, 2933-2949.**

Pubmed: [Author and Title](#)

Google Scholar: [Author Only Title Only Author and Title](#)

**Yuan, H., Meng, D., Gu, Z., Li, W., Wang, A., Yang, Q., Zhu, Y., and Li, T. (2014). A novel gene, MdSSK1, as a component of the SCF complex rather than MdSBP1 can mediate the ubiquitination of S-RNase in apple. J Exp Bot 65, 3121-3131.**

Pubmed: [Author and Title](#)

Google Scholar: [Author Only Title Only Author and Title](#)

**Zhang, Z., Zhang, B., Chen, Z., Zhang, D., Zhang, H., Wang, H., Zhang, Y., Cai, D., Liu, J., Xiao, S., Huo, Y., Liu, J., Zhang, L., Wang, M., Liu, X., Xue, Y., Zhao, L., Zhou, Y., and Chen, H. (2018). A PECTIN METHYLESTERASE gene at the maize Ga1 locus confers male function in unilateral cross-incompatibility. Nat Commun 9, 3678.**

Pubmed: [Author and Title](#)

Google Scholar: [Author Only Title Only Author and Title](#)

**Zhao, Y., Cheng, S., Song, Y., Huang, Y., Zhou, S., Liu, X., and Zhou, D.X. (2015). The Interaction between Rice ERF3 and WOX11 Promotes Crown Root Development by Regulating Gene Expression Involved in Cytokinin Signaling. Plant Cell 27, 2469-2483.**

Pubmed: [Author and Title](#)

Google Scholar: [Author Only Title Only Author and Title](#)

**Zhou, X., Zhang, Z.L., Park, J., Tyler, L., Yusuke, J., Qiu, K., Nam, E.A., Lumba, S., Desveaux, D., McCourt, P., Kamiya, Y., and Sun, T.P. (2016). The ERF11 Transcription Factor Promotes Internode Elongation by Activating Gibberellin Biosynthesis and Signaling. Plant Physiol 171, 2760-2770.**

Pubmed: [Author and Title](#)

Google Scholar: [Author Only Title Only Author and Title](#)
